# Supplementary material for: Cross-species hybridization and the origin of North African date palms
Source: PubMed Central journal article supplement — Proc Natl Acad Sci U S A. 2019 Jan 14;116(5):1651–8. doi: 10.1073/pnas.1817453116 (PMC6358688; doi:10.1073/pnas.1817453116), 2019-01-14
Supplement: pnas.1817453116.sapp.pdf [file pnas.1817453116.sapp.pdf]

## Supplementary Information for

Cross-species hybridization and the origin of North African date palms

Jonathan M. Flowers, Khaled M. Hazzouri, Muriel Gros-Balthazard, Ziyi Mo, Konstantina Koutroumpa, Andreas Perrakis, Sylvie Ferrand, Hussam S. M. Khierallah, Dorian Q. Fuller, Frederique Aberlenc, Christini Fournaraki and Michael D. Purugganan

Michael D. Purugganan  
Email: [mp132@nyu.edu](mailto:mp132@nyu.edu)

### **This PDF file includes:**

Supplementary Text  
Supplementary Materials and Methods  
Figs. S1 to S8  
Tables S1 to S11  
References for SI reference citations

### **Other supplementary materials for this manuscript include the following:**

Dataset S1

## Supplementary Information Text

**Archaeological evidence for date palms (*Phoenix* spp.).** The archaeobotanical evidence for the distribution of date palms or date fruits over time has been compiled in the companion document Dataset S1 as part of the Old World Crops Archaeobotanical Database (OWCAD) generated at UCL as part of the European Research Council funder research project on “Comparative Pathways to Agriculture” (ERC # 323842). This database consists of presence/absence data for a range of crops and economic taxa in archaeological sites, some broken into multiple phases, together with georeferences, dating evidence and a grade of evidential quality. The database covers all of Africa and Asia, with more selective coverage of Europe, and it is especially suited to tracking crops in time and space at broad scale, as illustrated, for example, at a Pan Asian scale for key cereals in (1).

The distribution of data in the database provides a visual assessment of geographical coverage of archaeobotanical data. For example supplementary Figure S6 plots all sites from the countries that include *Phoenix* finds (Morocco, Tunisia, Libya, Mali, Egypt, Sudan, Yemen, Oman, United Arab Emirates, Bahrain, Saudi Arabia, Iraq, Iran, Israel, Palestine, Syria, Pakistan, India, Tajikistan). Sites that contain some crop evidence are indicated with open circles, while those with reported *Phoenix* evidence are shown with blue triangles. This highlights the meager coverage of archaeobotanical data in the Sahara and Northern Africa, parts of Iran, Pakistan and Central Asia. Nevertheless, we still regard current evidence of *Phoenix* archaeology as informative.

Figure S7 plots the occurrences of archaeological date finds, referred to *P. dactylifera*, from this database in millennium time bands. Finds of wild sister species, including probable *P. theophrasti* in early western Asia and *P. sylvestris* in some Indian sites are mapped in Figure S8, along with the presumably intrusive date stones from Takarkori. Full details of the distribution of archaeological *Phoenix* in time and space, and which have been or ought to be referred to *P. theophrasti* and *P. sylvestris* are detailed in Dataset S1, followed by a full list of references.

There is additional evidence not plotted in Figure S7 or included Dataset S1 relating to ancient Egypt and southern Mesopotamia. Egypt has seen ~two centuries of archaeological exploration and large quantities of chance finds of plant remains have been recovered, reported, and deposited in museums. In many cases these are from tombs but also these are often poorly recorded as to provenance, and as such it is often hard to be certain that these finds are securely dated. A comprehensive catalogue of such evidence is provided by (2). The compilation provided here included material from the most secure contexts in Egypt (as judged by DQF) and material that comes from more recent systematic sampling. It nevertheless provides a representative overview of the Egyptian evidence for date palm. Out of 142 reports listed in (2) only 18 are older than Middle Kingdom (i.e. before 4000 ybp), while 110 are from the New Kingdom or later (i.e. after 3600 ybp), indicating the widespread establishment of date palm cultivation in Egypt between the Middle Kingdom and New Kingdom. This is reflected in another line of evidence, the art historical record, represented by scene on tomb walls, in which date palms are a regular part of garden scene from the New Kingdom onwards (3,4). Similarly, early cultivation and dates in southern Iraq are indicated by inclusion in the early pictographic script, by depictions on seals and other art from the Late Uruk (Warka) and Early Dynastic period that show date palms, indicating aspects of management (5). The artistic record agrees with the archaeobotanical evidence for the early establishment of date palm cultivation in southern Mesopotamia and its later establishment in Egypt.

The table of archaeobotanical data in Dataset S1 includes a few conventions on data quality. Confidence in the georeferences is graded on a scale from 1 to 3, with three being the most precise. The grade of 3 can be regarded as  $\pm 1\text{km}$ , the grade of 2 as  $\pm 10\text{km}$  and the grade of 1 as  $\pm 100\text{km}$ . Sample quality is also graded based on the conventions of (6), with 1= haphazard unsystematic sampling; 2= some systematic

sampling but insufficient reporting of detailed to allow full reanalysis of the data; an 3= full data with sample by sample quantitative data available. Finally quality of data evidence is graded. It is worth noting that very few *Phoenix* remains are directly dated by AMS radiocarbon, and they are therefore dated by association with other directly dated seeds (indicated by *AMS*) in Dataset S1 or other radiocarbon dates, on charcoal or bone (indicated by C14), or simply by associated artefactual material and regional chronologies (ass.). Dates are indicated in terms of likely earliest and latest dated by phase as well as the median between these, which can usually be regarded as the statistically most probable. Dates BCE are given as negative numbers and dates CE as positive.

## Supplementary Materials and Methods

**Sampling.** Date palm samples were obtained from various sources worldwide including 59 reported previously (7), and new samples from Pakistan (Gajar, Hawawiri, Otaquin), Iraq (Manjouma), Libya (Hamria, Barmel), and Morocco (Kamla, Bousl Khine, Raslatmar, Jihl, Boufkouss Rarass, and a Khalte sample). Wild *Phoenix* samples included seven *P. sylvestris*, six *P. canariensis*, and one *P. reclinata* collected from ornamental gardens in southern Europe or from specimens propagated from wild-collected seed (Table S1). Two *P. atlantica* samples were collected from the Cape Verde Islands (8). *Phoenix theophrasti* samples included 15 collected from natural populations in Crete, Greece, two samples from a putatively wild population in Epidaurus, Greece, and one sample from a possible hybrid population in Gölköy, Turkey.

**Library preparation and genome sequencing.** Genomic DNA was extracted from either leaf or fruit mesocarp/epicarp tissue (Table S1) and 2 X 100 paired-end libraries constructed with Nextera or TruSeq library preparation protocols and sequenced on an Illumina HiSeq 2000 or 2500 system according to the manufacturer's protocols. The date palm draft genome assembly (9) and annotation was downloaded from the National Center for Biotechnology Information (NCBI) on February 28, 2016. This genome is a female assembly that contains the scaffold sequences of RefSeq version DPV01 from (9), the mitochondrial genome (10; RefSeq ID: NC\_016740.1) and the chloroplast genome (11; RefSeq ID: NC\_013991.2). The nuclear, mitochondrial and chloroplast genomes were combined to form a single modified reference sequence that was used in all subsequent steps.

**Raw read and alignment processing.** Reads were demultiplexed and those passing Illumina quality control filters were processed with Trimmomatic (12; v. 0.36) to remove contaminating adapter sequences. For adapter removal, we used the adapter and Nextera transposase sequence database included with the Trimmomatic (v. 0.32) download with the following setting ILLUMINACLIP:<adapter library>:2:30:10 and only reads pairs where both reads in a pair were 76 bp or longer following trimming were retained for subsequent steps.

Processed reads were aligned to the unmasked date palm reference genome using bwa mem (13; v. 0.7.15-r1140). The bwa mem aligner was run with the -M option to mark supplementary reads (0x800 bitwise flag) as secondary (0x100). Sample alignments were processed with FixMateInformation (Picard-tools v. 2.8.2; <http://broadinstitute.github.io/picard>) to ensure consistency in paired-read information, SamSort (Picard-tools v. 2.8.2) to coordinate-sort the alignments, MarkDuplicates (Picard-tools v. 2.8.2) to flag duplicate read pairs, and with GATK IndelRealignerTargetCreator/IndelRealigner tool (14; GATK v. 3.7-0) to realign reads in indel regions. Sample alignments were validated at each step using ValidateSam (Picard-tools v. 2.8.2) to ensure no errors in production. Processed alignments were summarized with CollectAlignmentSummaryMetrics (Picard-tools v. 2.8.2) and Samtools (15; Table S2).

**SNP-calling and genotyping.** SNP-calling and genotyping was performed with the GATK (GATKv. 3.7-0) HaplotypeCaller run in GVCF mode followed by joint-genotyping with GenotypeGVCFs (16). Reads were filtered from the HaplotypeCaller step to exclude those with a mapping quality less than 20 and to exclude those marked as PCR duplicates or secondary alignments (see above). This approach yielded 39,476,646 SNPs and 5,290,078 indels across all samples.

We restricted analysis to the non-repetitive fraction of the genome assembly by excluding SNPs in regions masked by RepeatMasker (<http://www.repeatmasker.org>). Additional SNP filtering was conducted by applying hard filters to the raw variants. Thresholds were determined by considering GATK guidelines, considering the impact of thresholds on the transition:transversion ratio (14), and drawing on the approaches of comparable re-sequencing studies of non-model organisms and their relatives. For example, we observed a dependence of the proportion of called heterozygotes on depth in the raw variant calls as expected if spurious SNPs called in regions of the draft assembly with collapsed repeats (17). We therefore tailored our filtering thresholds to minimize this dependency by filtering the raw call set to exclude SNPs with low (< 800) and high depth (> 2200) summed across samples. We also excluded multi-allelic SNPs, SNPs within 6 bp of indel polymorphisms, SNPs with a genotype call rate < 85%, and SNPs meeting the following conditions: FS > 60.0, SOR > 3.0, QD < 8.0, MQ < 40.0, MQRankSum < -3.0, ReadPosRankSum < -1.5, BaseQRankSum < -8.0 (see <https://software.broadinstitute.org/gatk/> for tag definitions). This procedure yielded a filtered call set of 14,402,469 SNPs that served as the basis for all analysis.

SNPs from the chloroplast and mitochondrial genomes were called using the same GATK HaplotypeCaller/joint-genotyping work flow. SNPs were called with ploidy set to diploid to identify heterozygous genotypes attributable to heteroplasmy (18) or insertions of either plastid genome into nuclear DNA. We applied both SNP and genotype filters to the mitochondrial and chloroplast call sets. Genotypes were set to missing if the Phred-scaled genotype quality (GQ) was less than 20. SNPs were filtered by excluding SNPs in which any sample had a heterozygous or missing genotype, excluding SNPs in the region of the chloroplast genome that is duplicated in the mitochondrial genome based on coordinates reported (19), and excluding sites found in repeat regions reported in (19,20). We then applied SNP filters to the cpDNA and mtDNA SNPs with thresholds modified after (21). SNPs meeting the following criteria were excluded: QD < 2.0, FS > 60.0, MQ < 40.0, MQRankSum < -12.5, ReadPosRankSum < -8.0, sites within 10 bp of called indels, and sites reported as repeat regions. This filtering strategy reduced the total number of raw chloroplast SNPs from 436 to 121 and mitochondrial from 6,019 to 760.

**Phylogeny Reconstruction.** Neighbor-joining trees were generated for mtDNA, cpDNA and selected introgressed regions using the JC69 model of nucleotide substitution with the ape and phangorn packages in R. Bootstrap support values for branches were calculated with 1000 resampling iterations and output trees produced with Dendroscope with branches with less than 50% support collapsed. Maximum likelihood phylogenies were constructed with Randomized Axelerated Maximum Likelihood (RAxML; 22). The phylogeny based on SNPs in the nuclear genome was produced with the Generalized Time Reversible (GTR) substitution model with Gamma rate heterogeneity (-m GTRGAMMA) using 33,505 variable sites, but excluding sites with heterozygotes. An ascertainment bias correction (-m ASC\_GTRGAMMA --asc-corr=lewis) was applied to likelihood calculations to prevent overestimation of branch lengths and biases in tree topology. The number of bootstrap iterations was determined by the automatic majority-rule consensus tree criterion for bootstrap convergence (-# autoMR). Output trees were produced with Dendroscope. Maximum Likelihood cpDNA and mtDNA trees used the same settings but are based on all SNPs in the filtered datasets for these genomes.

**Population statistics.** Statistics nucleotide diversity ( $\pi$ ), Watterson's  $\theta$  ( $\theta_w$ ) and Tajima's D were calculated for each population or species in 5 kb non-overlapping intervals using ANGSD (v. 0.917)



using sample BAM alignments as input. Estimates were obtained for each population by excluding probable hybrid individuals and by filtering out reads with mapping quality < 20 and base quality < 20.  $F_{st}$  was calculated in the same 5 kb non-overlapping intervals from the filtered SNP call set using vcfTools (23; v. 0.1.14) analysis by excluding probable hybrid *P. theophrasti* samples in comparisons with *P. dactylifera* and varieties of date palm from Egypt and Sudan in  $F_{st}$  estimates between date palm populations.

**Population clustering.** Model-based clustering of genotypic data was performed with STRUCTURE (24). The filtered SNP dataset was randomly sub-sampled to include ~30,000 SNPs to limit the effects of linkage on the analysis. STRUCTURE was then run with the Admixture model with correlated allele frequencies without including geographic or species-membership information for  $K = 1$  to  $K = 8$  with chain lengths between 750,000 and 1,000,000 steps and burn in of 200,000 steps. Analyses were then repeated by running the Admixture model with independent allele frequencies. A second set of “hierarchical” analyses was run separately on species pairs (i.e., date palms and a wild relative *P. sylvestris*, *P. theophrasti*, or *P. canariensis*) again for both correlated and independent allele frequency models. Admixture proportions were monitored for consistency across replicates and the run with the highest maximum likelihood run at each  $K$  are presented (Fig. 2). Additional summary metrics were calculated with STRUCTURE Harvester (25). Analysis of the full set of samples was repeated with a second set of ~30,000 random SNPs to confirm the results were not sensitive to a particular set of SNPs. All outputs were qualitatively similar between the two SNP sets.

**Admixture tests.** Tests for admixture were conducted by selecting a subset of samples from each population. We selected six samples from Libya, Tunisia, Algeria, and Morocco for our North African sample, six Middle Eastern, six *P. sylvestris* (excluding a probable date palm hybrid from Faisalabad, Pakistan), six *P. theophrasti* (excluding any putative *P. dactylifera* X *P. theophrasti* hybrids), six *P. canariensis*, and one *P. reclinata*. In a separate set of analysis we defined a population consisting of four Egyptian samples. All tests of admixture were performed with the Popstats software (<https://github.com/pontussk/popstats>).

We used the  $D$ -statistic to test for admixture between *Phoenix* wild relatives and *P. dactylifera* populations (26,27). Since we were interested in gene flow between date palm and its wild relatives, we focused on tests that included North African and Middle Eastern populations and a wild relative as the test population. In these tests, P1 and P2 are sister taxa, P3 is a test population, and P4 is an outgroup, which corresponds to the notation  $D(P1,P2,P3,O)$ . We note that this is equivalent to the notation  $D(O,P3;P1,P2)$  used by the Popstats software.

We performed tests where P1 and P2 are Middle Eastern and North African populations, respectively, and wild relatives *P. sylvestris*, *P. theophrasti*, or *P. canariensis* were the test population. *Phoenix canariensis* or *P. reclinata* were included as outgroups.  $D$ -tests were performed with the approach of (27) for SNP data. Significance was assessed by block jackknife by treating each scaffold as a block and weighting each block by the number of SNPs. The standard error (SE) of the test statistic was used to define a Z-score ( $D/SE$ ; 26). For the tests presented, we excluded scaffolds shorter than 800 kb in our analysis as inclusion of smaller scaffolds led to smaller standard errors and inflated  $|Z|$ .  $|Z|$  used to assess significance may be over-estimated in some cases owing to the constraints on increasing the jackknife block sizes given the current state of the draft assembly.

We employed the  $f_3$  statistic to test for admixture within the shared genetic drift framework of (28-30). The  $f_3$ -statistic tests for admixture among three populations. In the no-admixture case, the  $f_3$  test of the form  $f_3(Px;P1,P2)$  measures the branch length in a population phylogeny between  $Px$  and the internal node of the unrooted tree. The statistic in this case is expected to be greater than zero. Negative  $f_3$  is

indicative of  $P_x$  having a mixed ancestry from  $P_1$  and  $P_2$  or populations closely related to them. Significance was assessed using the same approach as the  $D$ -statistic described above.

**Population modeling.** *TreeMix* is a software for modeling population history as a directed acyclic graph with both split and mixture events (31). *TreeMix* constructs a population tree that maximizes the composite likelihood of the observed covariance in allele frequencies among populations. It then sequentially adds migration edges to connect pairs of populations that show a relative excess of allele frequency covariance and are therefore poor fits to the strict tree model. For this analysis, we chose six samples from each *P. canariensis*, *P. theophrasti*, *P. sylvestris*, North African and Middle Eastern date palm and the single *P. reclinata* sample. For each set of analyses, we ran *TreeMix* with either zero, one, or two migration events and specified either *P. reclinata* as the root taxon. For models from which we dropped *P. reclinata*, we included *P. canariensis* as the root. We confirmed that the inferred population tree and migration edges are robust to different input taxa and to different block sizes incorporated to account for linkage disequilibrium among linked SNPs.

**Ancestry proportions.** The  $f_4$  statistic is closely related to  $D$ -tests differing only in the denominator of the two statistics (29). Ancestry proportions in an admixed population can be estimated by calculating a ratio of appropriate  $f_4$  statistics assuming a specific phylogeny (28-30). When estimating ancestry proportions in North African date palms with the  $f_4$ -ratio approach, we assume that *P. dactylifera* and *P. sylvestris* are sister species and that *P. canariensis* (or *P. reclinata*) is an outgroup to *P. dactylifera*, *P. sylvestris*, and *P. theophrasti*. We then estimate the proportion of North African date palm ancestry that traces to the Middle Eastern date palm population as:

$$\alpha = f_4(\textit{sylvestris}, \textit{canariensis}; \textit{dactylifera}_{\text{NAF}}, \textit{theophrasti}) / f_4(\textit{sylvestris}, \textit{canariensis}; \textit{dactylifera}_{\text{ME}}, \textit{theophrasti})$$

where *dactylifera*<sub>NAF</sub> represents North African date palm and *dactylifera*<sub>ME</sub> represents the Middle East. The proportion of North African ancestry that traces to *P. theophrasti* in this context is defined as  $1 - \alpha$ .

The ancestry of Egyptian samples was calculated separately by replacing North African date palm samples with those from Egypt in the above  $f_4$ -ratio calculations. In addition, we repeated the North African and Egyptian  $f_4$ -ratio calculations by replacing *P. canariensis* with *P. reclinata* to assess the robustness of the ancestry estimates to outgroup species. Standard errors of  $f_4$ -ratios were estimated with the weighted block jackknife approach described for the  $D$ -statistic.  $f_4$ -ratio estimation was performed with Popstats on the set of scaffolds 800 kb or larger. Estimates of ancestry proportions from *TreeMix* are based on the mixture weights on the migration edges (31).

#### Identification of *P. theophrasti*-like and Middle-Eastern-like alleles

We identified SNPs that are fixed between *P. theophrasti* and the Middle Eastern date palm population. Samples used to infer fixations were all Middle Eastern date palm and *P. theophrasti* (excluding probable hybrid individuals). We then evaluated whether the North African population was fixed for the Middle Eastern-like allele, fixed for the *P. theophrasti*-like allele, or polymorphic for both.

**Population statistics in introgressed regions.** The introgression fraction,  $f_d$ , was obtained from the filtered SNP call set in non-overlapping intervals of 5 kb with a script reported in (32).  $f_d$  was calculated for the ABBA-BABA configuration  $D(P_1=\text{Middle East}, P_2=\text{North Africa}, P_3=\textit{theophrasti}, O=\textit{reclinata})$ . Introgressed tracts were defined as two or more consecutive intervals of 5 kb with  $f_d$  in the upper 10<sup>th</sup> percentile of the genomewide distribution. Comparisons of population statistics across  $f_d$  bins were obtained by subsetting intervals with  $D < 0$  (in the above configuration) as these regions show no evidence of excesses of shared derived alleles between  $P_2$  and  $P_3$  and  $f_d$  is therefore not a quantitatively meaningful measure of introgression (32). The remaining intervals were then ranked by  $f_d$  and binned into

20 bins with the same number of 5 kb intervals in each bin (see Fig. S5). Population summary statistics were then summarized for each bin.

**Local haplotype phasing.** Regions of the genome that showed introgression signatures were phased locally to build phylogenetic trees of local haplotypes, genotypes on scaffolds that showed a signatures of introgression were phased by Beagle (33; v. 4.1). Beagle performs haplotype inference using a Hidden Markov Model (HMM) of localized haplotype-clusters and applies stochastic expectation-maximization (EM) to iteratively improve the likelihood of the inferred haplotype pairs. Neighbor-joining trees of selected phased regions were then generated following the same approach outlined above.

**LD decay.** LD was calculated using vcfTools (23; v0.1.14) with command line options `--geno-r2 --maf 0.1 --ld-window-bp 100000` to calculate LD for unphased SNPs, exclude SNPs with minor allele frequency < 10%, and exclude pairs of sites further than 100 kb apart. Twenty North African samples and 20 randomly selected Middle Eastern samples were included for the calculation of North African and Middle Eastern population LD, respectively. All LD analyses were based on 516 scaffolds in the genome assembly that exceed 200 kb in length. To reduce the total number of pairwise comparisons, the filtered SNP call set was down-sampled to keep 33% of all sites.

LD decay curves were plotted by nonlinear least squares (nls) regression using an approach adapted from (34), which fits LD data to the following model (35):

$$\mathbb{E}(r^2) = \left[ \frac{10 + C}{(2 + C)(11 + C)} \right] \left[ 1 + \frac{(3 + C)(12 + 12C + C^2)}{n(2 + C)(11 + C)} \right]$$

where  $n$  is the sample size and  $C$ , the parameter to be estimated, represents the product of the population recombination parameter and the distance in base pairs. Half decay distance was estimated by taking the distance at which the value of the curve is half of its maximum value (i.e. at 1 bp).

**Private alleles.** We identified private polymorphisms in each population or species using the filtered SNP call set. We define a private polymorphism as a SNP segregating for an allele (“private allele”) that is restricted in its distribution to a particular focal population or species in our analysis. Private polymorphisms were discovered by defining a focal set of samples and then identifying SNPs in which one of the two alleles is restricted to that set at the exclusion of the other samples in the analysis (the “non-focal set”). We define private fixations as an allele observed at 100% frequency in the focal population or species, but not observed in the non-focal set.

In all private allele analysis, we excluded wild relative samples that appear to be inter-specific hybrids (1 *P. sylvestris*, 5 *P. theophrasti*), all samples from Egypt/Sudan (which are highly admixed between date palm populations), and date palm cultivars from more recently established production areas in Pakistan, which in some cases show admixture between Middle East and North African populations (e.g., the Aseel variety). For analysis of private alleles in North African date palm and *P. dactylifera* (Middle East + North Africa) we also excluded the two *P. atlantica* samples which are similar to North African date palm as the inclusion of these samples in the non-focal set reduces the number of private polymorphisms in North Africa and *P. dactylifera*.

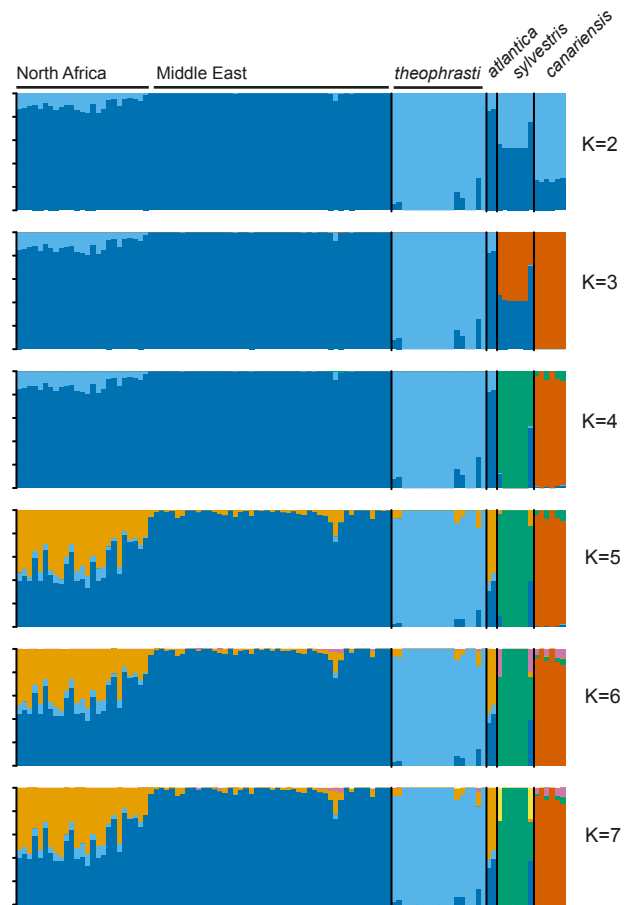

**Fig. S1.** STRUCTURE analysis with correlated frequency model.

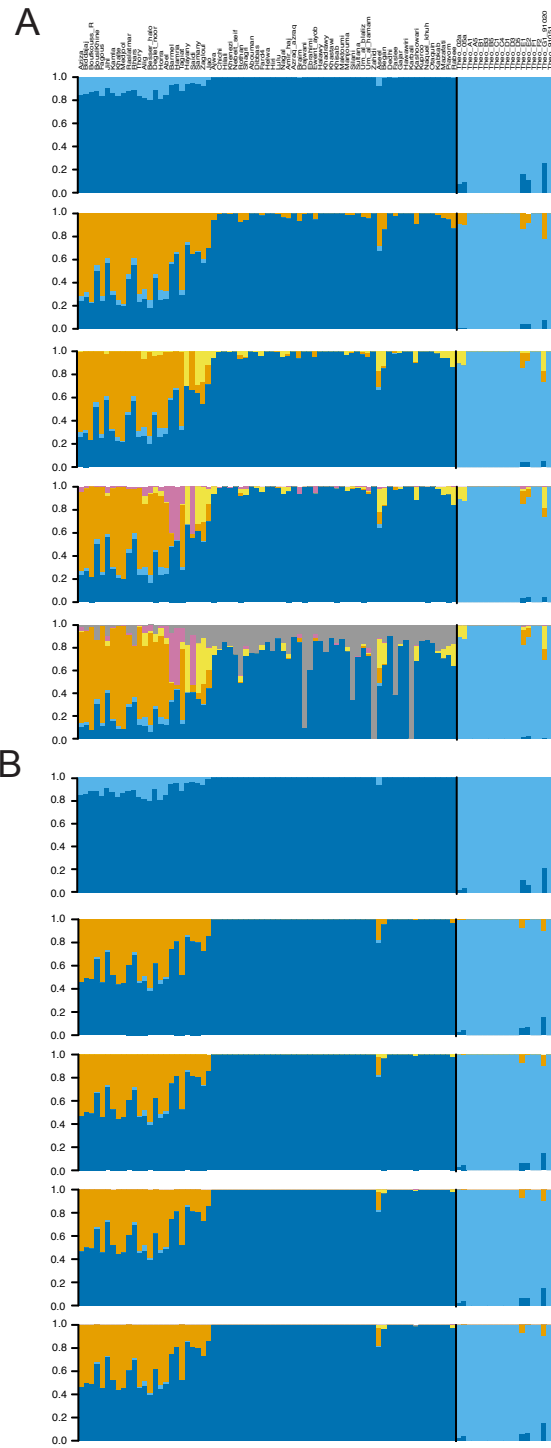

**Fig. S2.** Pairwise STRUCTURE analysis of *P. theophrasti* and date palm. (A) The correlated allele frequency model (K = 2 - 6), and (B) independent allele frequency model with date palm and *P. theophrasti* samples only (K = 2 - 6).

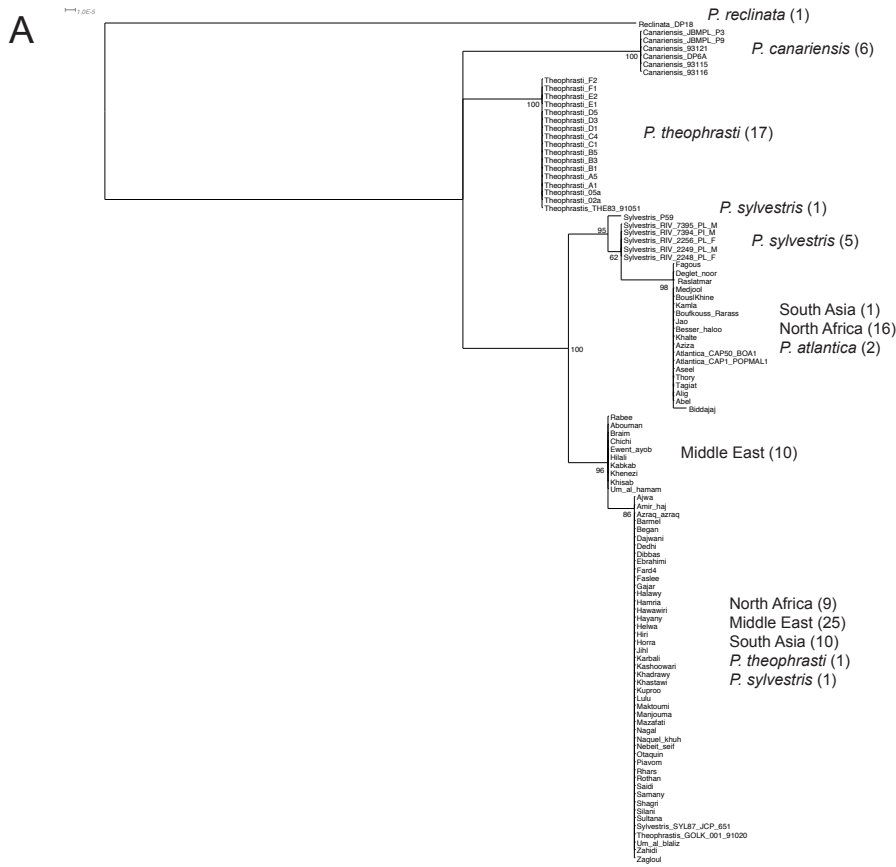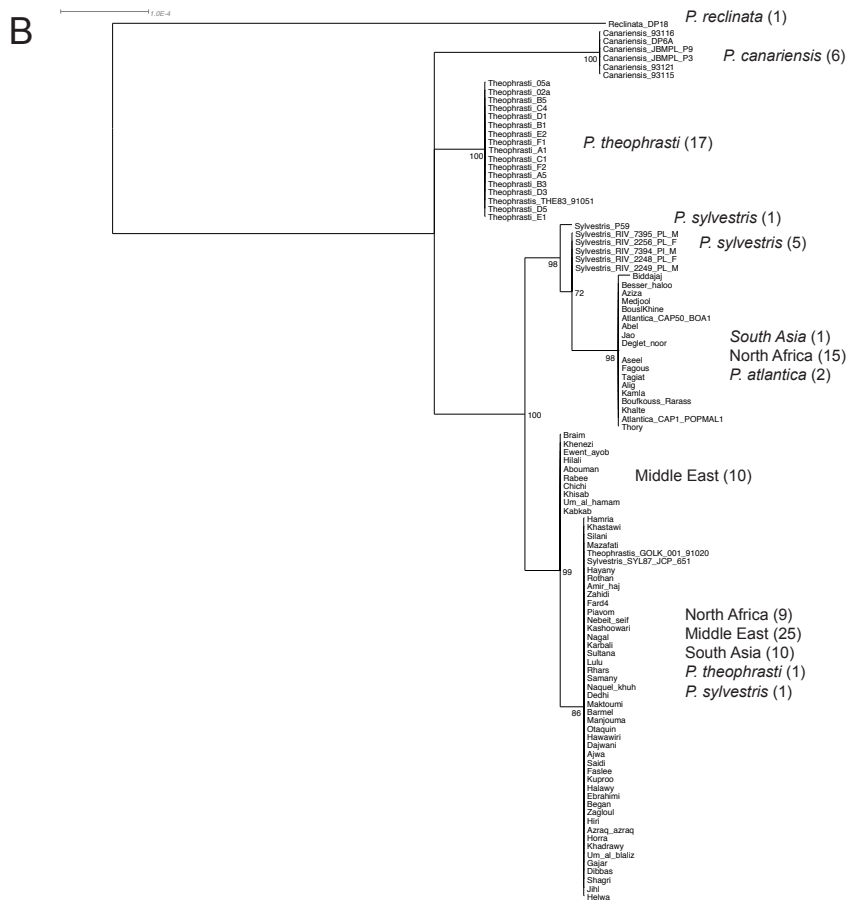

**Fig. S3.** Phylogeny of *Phoenix* species based on whole genome re-sequencing of chloroplast DNA. The number of samples from each date palm region or *Phoenix* wild relative is shown. (A) Neighbor-joining tree based on JC69-corrected distances. Node support values are the percent of bootstrap replicates supporting the node. (B) Maximum Likelihood tree. Node support values are the percent of bootstrap replicates supporting the node. Nodes with less than 50% support have been collapsed in both (A) and (B).

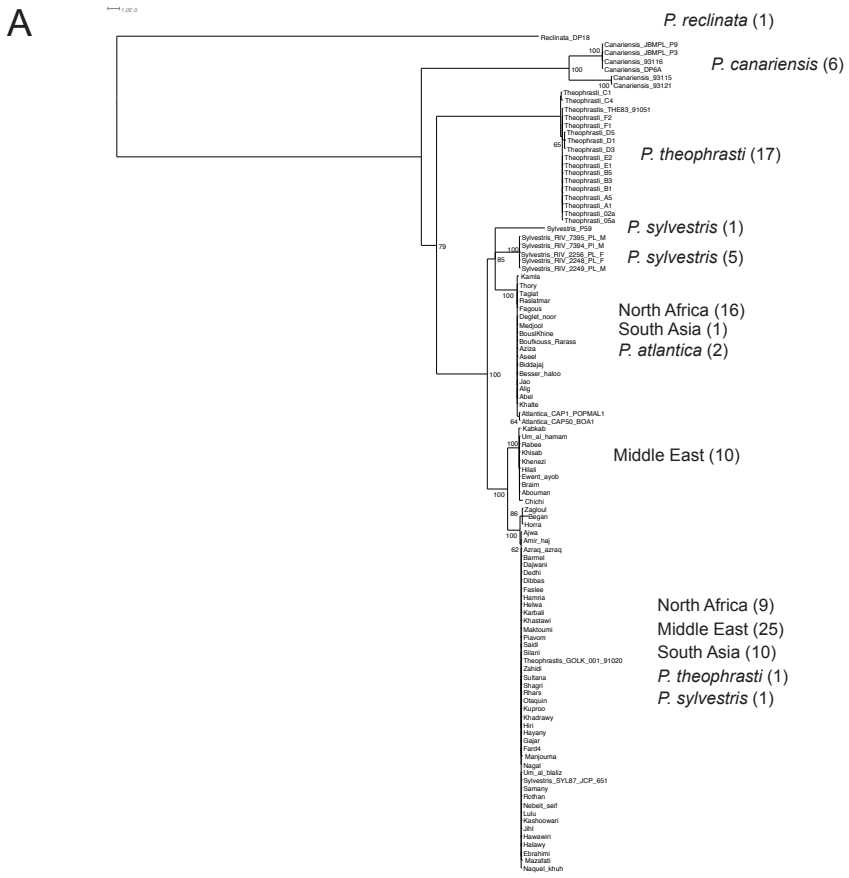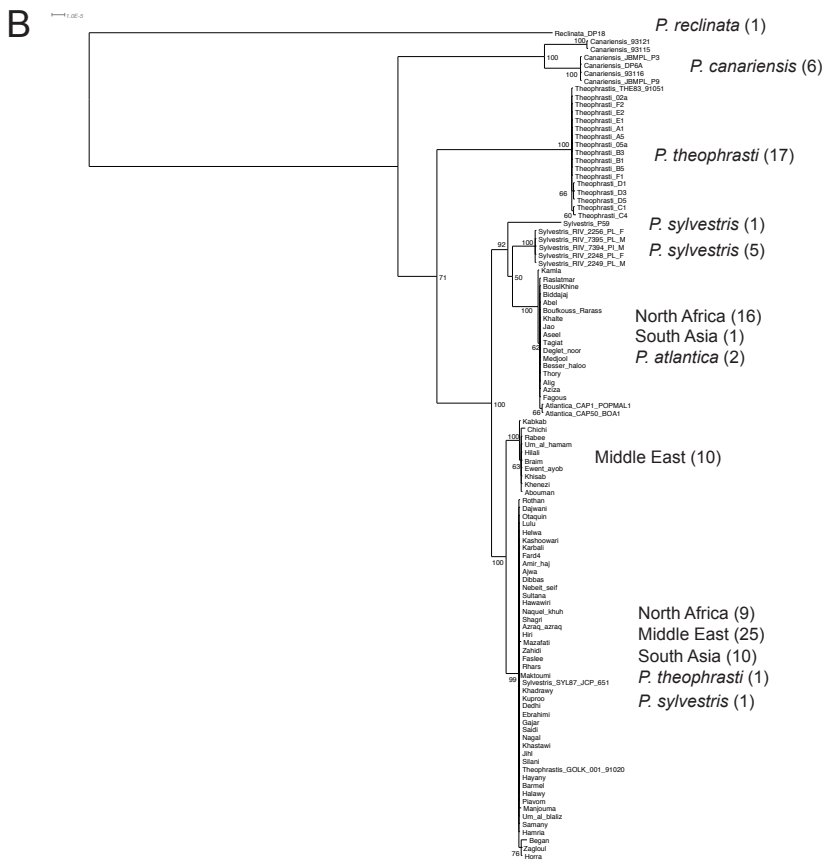

**Fig. S4.** Phylogeny of *Phoenix* species based on whole genome re-sequencing of mitochondrial DNA. The number of samples from each date palm region or *Phoenix* wild relative is shown. (A) Neighbor-joining tree based on JC69-corrected distances. Node support values are the percent of bootstrap replicates supporting the node. (B) Maximum Likelihood tree. Node support values are the percent of bootstrap replicates supporting the node. Nodes with less than 50% support have been collapsed in both (A) and (B).

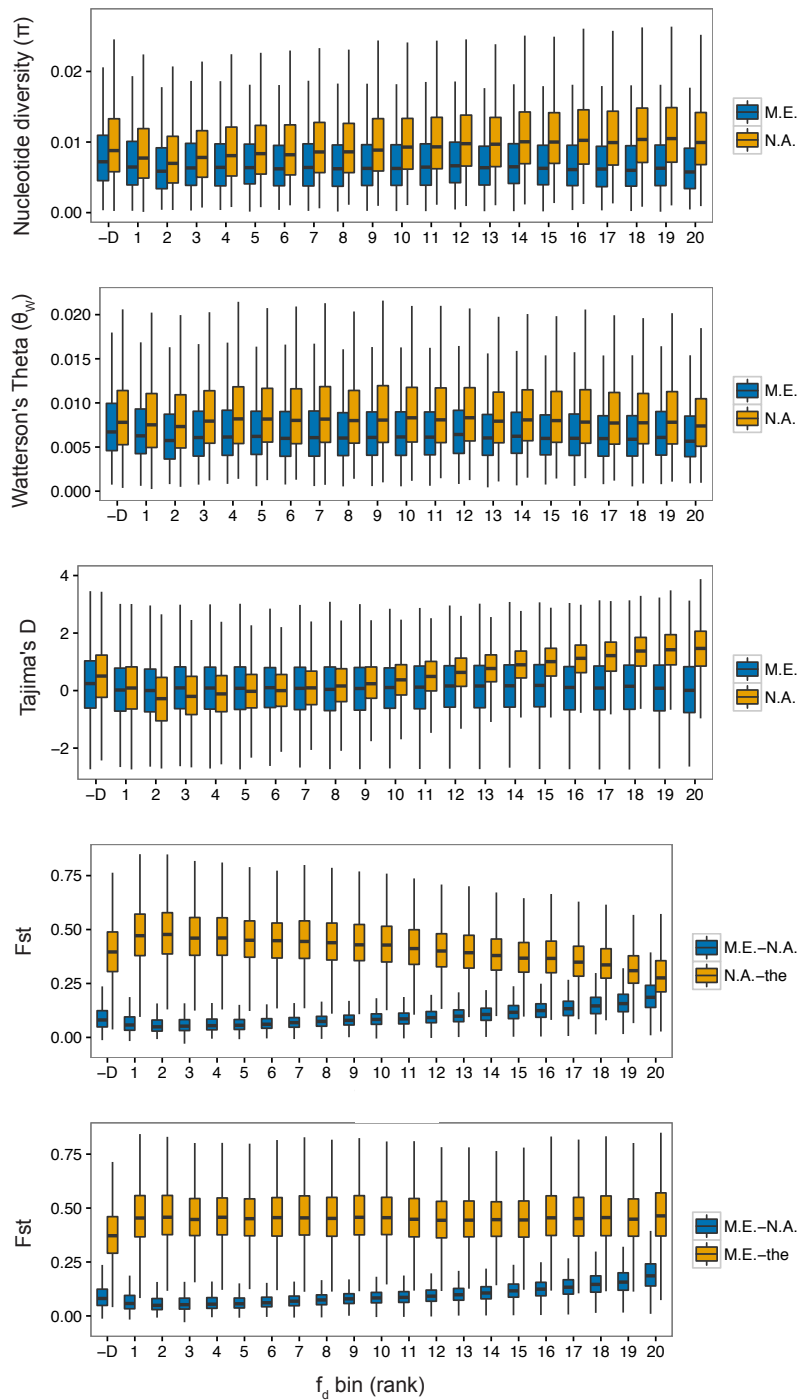

**Fig. S5.** Population genetic summary statistics in rank-ordered introgression fraction bins ( $f_d$ ) for the population configuration D(Middle East, North Africa, *P. theophrasti*, *P. reclinata*).  $f_d$  was calculated in 5 kb intervals and bins with positive  $D$  binned according to percentile such that each bin has approximately the same number of genomic intervals. The bin labelled -D are those intervals where  $D$  is negative and which  $f_d$  has no meaningful quantification of introgression (32) and may not contain same number of intervals as bins with positive  $D$ . Boxplots were then generated for various population genetic statistics in each  $f_d$  bin. M.E. = Middle Eastern date palm, N.A. = North African date palm, the = *P. theophrasti*.



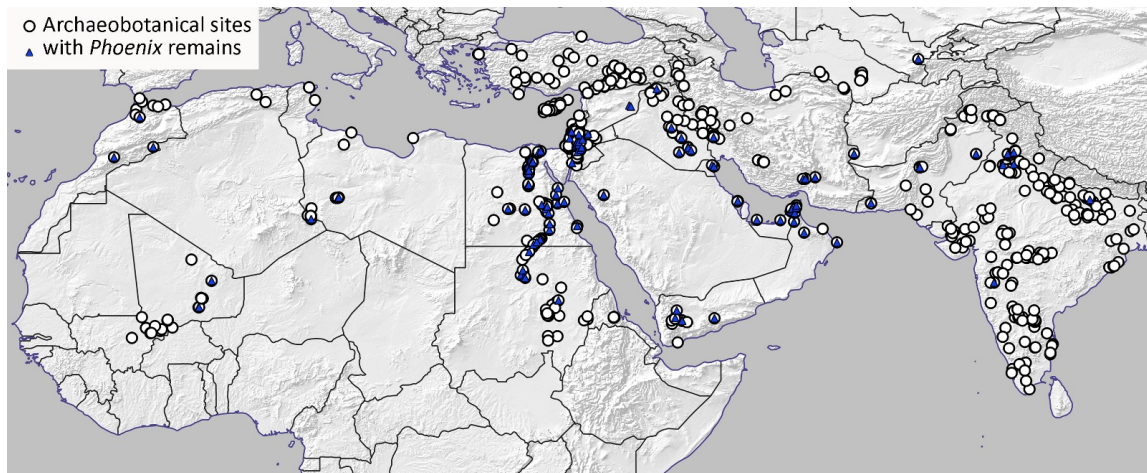

**Fig. S6.** Distribution of *Phoenix* archaeological reports from the relevant range of dates among all sites with archaeobotanical data for a selection of countries.

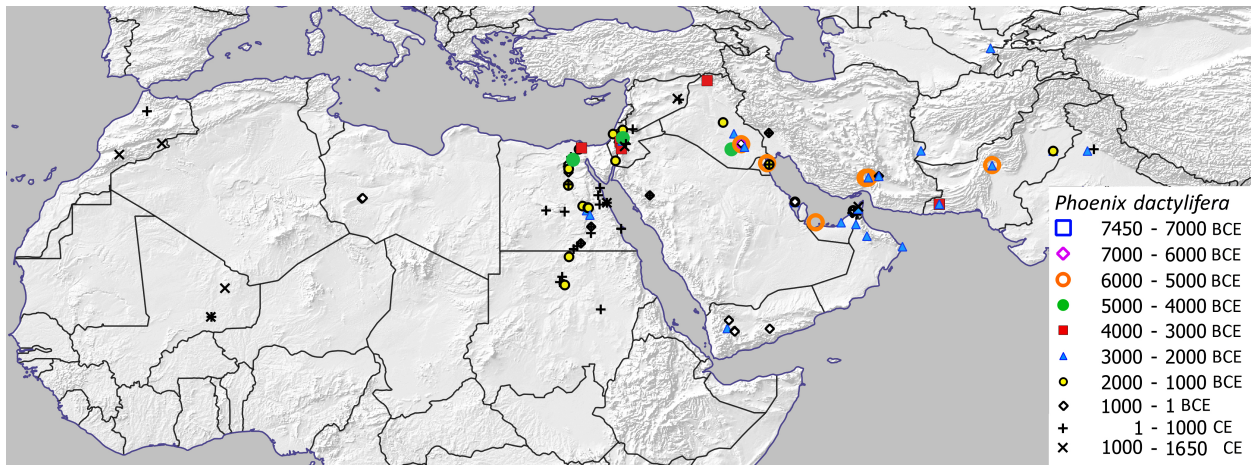

**Fig. S7.** A map of archaeological finds of *P. dactylifera* differentiated by age.

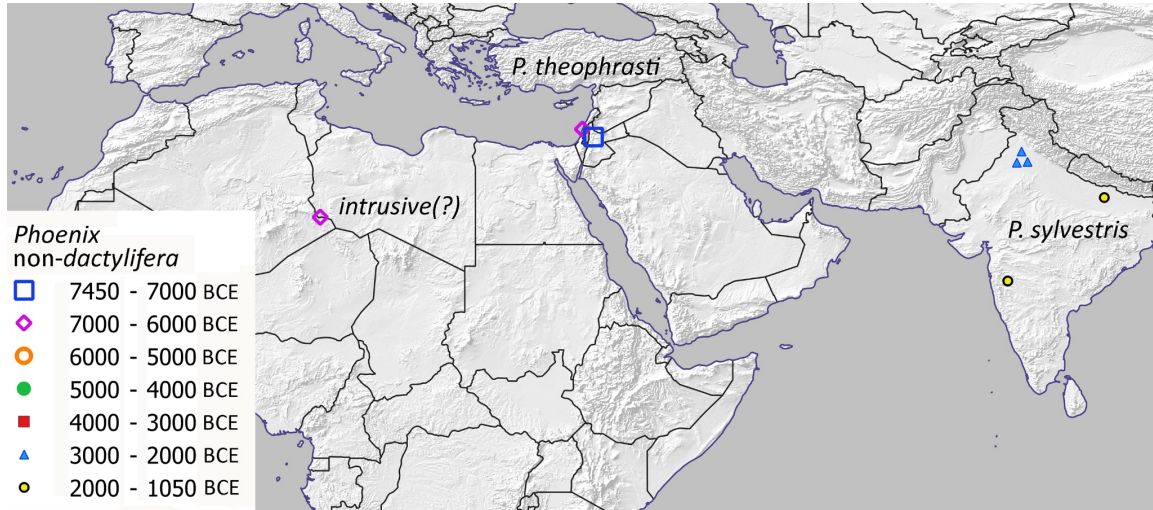

**Fig. S8.** Distribution of archaeological finds excluded from Fig. S7, including *P. sylvestris*, *P. theophrasti*, and probably intrusive Takarkori find.

**Table S1.** Sample information.

| Sample *         | Species     | Origin <sup>a</sup> | Collecting Locale | Sex | Source <sup>b</sup> | Tissue |
|------------------|-------------|---------------------|-------------------|-----|---------------------|--------|
| Kamla            | dactylifera | Morocco             | Morocco           | F   | market              | fruit  |
| Khalte           | dactylifera | Morocco             | Morocco           | F   | market              | fruit  |
| Bousl Khine      | dactylifera | Morocco             | Morocco           | F   | market              | fruit  |
| Raslatmar        | dactylifera | Morocco             | Morocco           | F   | market              | fruit  |
| Jihl             | dactylifera | Morocco             | Morocco           | F   | market              | fruit  |
| Boufkouss Rarass | dactylifera | Morocco             | Morocco           | F   | market              | fruit  |
| Aziza            | dactylifera | Morocco             | Morocco           | F   | market              | fruit  |
| Fagous           | dactylifera | Morocco             | Morocco           | F   | market              | fruit  |
| Biddajaj         | dactylifera | Morocco             | Morocco           | F   | market              | fruit  |
| Medjool          | dactylifera | Morocco             | UAE               | F   | DPTCL <sup>c</sup>  | leaf   |
| Thory            | dactylifera | Algeria             | California, USA   | F   | USDA <sup>d</sup>   | leaf   |
| Rhars            | dactylifera | Algeria             | Arizona, USA      | F   | ASU <sup>e</sup>    | leaf   |
| Deglet Noor      | dactylifera | Algeria             | Tunisia           | F   | TCD <sup>f</sup>    | leaf   |
| Alig             | dactylifera | Tunisia             | Tunisia           | F   | TCD                 | leaf   |
| Besser Haloo     | dactylifera | Tunisia             | Tunisia           | F   | TCD                 | leaf   |
| Horra            | dactylifera | Tunisia             | California, USA   | F   | USDA                | leaf   |
| Abel             | dactylifera | Libya               | Libya             | F   | market              | fruit  |
| Tagiat           | dactylifera | Libya               | Libya             | F   | market              | fruit  |
| Hamria           | dactylifera | Libya               | Libya             | F   | market              | fruit  |
| Barmel           | dactylifera | Libya               | Libya             | F   | market              | fruit  |
| Hayany           | dactylifera | Egypt               | California, USA   | F   | USDA                | leaf   |
| Samany           | dactylifera | Egypt               | California, USA   | F   | USDA                | leaf   |
| Saidi            | dactylifera | Egypt               | California, USA   | F   | USDA                | leaf   |
| Zagloul          | dactylifera | Egypt               | Syria             | F   | AECS <sup>g</sup>   | leaf   |
| Jao              | dactylifera | Sudan               | UAE               | F   | market              | fruit  |
| Chichi           | dactylifera | Saudi Arabia        | UAE               | F   | DPTCL               | leaf   |
| Hilali           | dactylifera | Saudi Arabia        | California, USA   | F   | USDA                | leaf   |
| Rothan           | dactylifera | Saudi Arabia        | UAE               | F   | ICBA <sup>h</sup>   | leaf   |
| Shagri           | dactylifera | Saudi Arabia        | UAE               | F   | ICBA                | leaf   |
| Khenezi          | dactylifera | Saudi Arabia        | UAE               | F   | DPTCL               | leaf   |

|                       |             |              |                 |   |                   |       |
|-----------------------|-------------|--------------|-----------------|---|-------------------|-------|
| Nebeit Seif           | dactylifera | Saudi Arabia | UAE             | F | DPTCL             | leaf  |
| Ajwa                  | dactylifera | Saudi Arabia | UAE             | F | ICBA              | leaf  |
| Dibbas                | dactylifera | UAE          | UAE             | F | DPTCL             | leaf  |
| Helwa                 | dactylifera | UAE          | UAE             | F | DPTCL             | leaf  |
| Hiri                  | dactylifera | UAE          | UAE             | F | DPTCL             | leaf  |
| Fard #4               | dactylifera | UAE          | California, USA | M | USDA              | leaf  |
| Lulu                  | dactylifera | UAE          | UAE             | F | DPTCL             | leaf  |
| Abouman               | dactylifera | UAE          | UAE             | F | DPTCL             | leaf  |
| Nagal                 | dactylifera | UAE          | UAE             | F | market            | fruit |
| Maktoumi              | dactylifera | Iraq         | UAE             | F | DPTCL             | leaf  |
| Khadrawy <sup>1</sup> | dactylifera | Iraq         | California, USA | F | USDA              | leaf  |
| Khastawi              | dactylifera | Iraq         | Arizona, USA    | F | ASU               | leaf  |
| Sultana               | dactylifera | Iraq         | UAE             | F | DPTCL             | leaf  |
| Um al hamam           | dactylifera | Iraq         | Iraq            | F | DPRU <sup>i</sup> | leaf  |
| Um al blaliz          | dactylifera | Iraq         | Iraq            | F | DPRU              | leaf  |
| Ewent ayob            | dactylifera | Iraq         | Iraq            | F | DPRU              | leaf  |
| Azraq azraq           | dactylifera | Iraq         | Iraq            | F | DPRU              | leaf  |
| Ebrahimi              | dactylifera | Iraq         | Iraq            | F | DPRU              | leaf  |
| Dajwani               | dactylifera | Iraq         | Iraq            | F | DPRU              | leaf  |
| Silani                | dactylifera | Iraq         | Iraq            | F | DPRU              | leaf  |
| Khisab                | dactylifera | Iraq         | California, USA | F | USDA              | leaf  |
| Halawy                | dactylifera | Iraq         | California, USA | F | USDA              | leaf  |
| Zahidi                | dactylifera | Iraq         | California, USA | F | USDA              | leaf  |
| Amir Haj              | dactylifera | Iraq         | California, USA | F | USDA              | leaf  |
| Manjouma              | dactylifera | Iraq         | Iraq            | F | DPRU              | leaf  |
| Braim <sup>1</sup>    | dactylifera | Iraq         | Arizona, USA    | F | ASU               | leaf  |
| Kabkab (red)          | dactylifera | Iran         | Syria           | F | AECS              | leaf  |
| Mazafati              | dactylifera | Iran         | Qatar           | F | WCMC <sup>j</sup> | fruit |
| Piavom                | dactylifera | Iran         | Qatar           | F | WCMC              | fruit |
| Rabee                 | dactylifera | Iran         | Qatar           | F | WCMC              | fruit |
| Kashoowari            | dactylifera | Pakistan     | Sindh, Pakistan | F | DPRI <sup>k</sup> | leaf  |
| Dedhi                 | dactylifera | Pakistan     | Sindh, Pakistan | F | DPRI              | leaf  |
| Naquel Khuh           | dactylifera | Pakistan     | Sindh, Pakistan | F | DPRI              | leaf  |
| Aseel                 | dactylifera | Pakistan     | Sindh, Pakistan | F | DPRI              | leaf  |

|                             |             |                  |                      |   |               |      |
|-----------------------------|-------------|------------------|----------------------|---|---------------|------|
| Kuproo                      | dactylifera | Pakistan         | Sindh, Pakistan      | F | DPRI          | leaf |
| Began                       | dactylifera | Pakistan         | Sindh, Pakistan      | F | DPRI          | leaf |
| Faslee                      | dactylifera | Pakistan         | Sindh, Pakistan      | F | DPRI          | leaf |
| Karbali                     | dactylifera | Pakistan         | Sindh, Pakistan      | F | DPRI          | leaf |
| Gajar                       | dactylifera | Pakistan         | Sindh, Pakistan      | F | DPRI          | leaf |
| Hawawiri                    | dactylifera | Pakistan         | Sindh, Pakistan      | F | DPRI          | leaf |
| Otaquin                     | dactylifera | Pakistan         | Sindh, Pakistan      | F | DPRI          | leaf |
| Sylvestris [RIV 2256 PL]    | sylvestris  | -                | California, USA      | F | USDA          | leaf |
| Sylvestris [RIV 7394 PI]    | sylvestris  | -                | California, USA      | M | USDA          | leaf |
| Sylvestris [RIV 2248 PL]    | sylvestris  | -                | California, USA      | F | USDA          | leaf |
| Sylvestris [RIV 7395 PL]    | sylvestris  | -                | California, USA      | M | USDA          | leaf |
| Sylvestris [RIV 2249 PL]    | sylvestris  | -                | California, USA      | M | USDA          | leaf |
| Sylvestris [P59]            | sylvestris  | -                | Valencia, Spain      | ? | garden        | leaf |
| Sylvestris [SYL87 JCP 651]  | sylvestris  | -                | Faisalabad, Pakistan | M | garden        | leaf |
| Canariensis [JBMPL P3]      | canariensis | -                | Montpelier, France   | F | garden        | leaf |
| Canariensis [JBMPL P9]      | canariensis | -                | Montpelier, France   | M | garden        | leaf |
| Canariensis [93115]         | canariensis | -                | Sanremo, Italy       | F | garden        | leaf |
| Canariensis [93116]         | canariensis | -                | Sanremo, Italy       | M | garden        | leaf |
| Canariensis [93121)         | canariensis | -                | Sanremo, Italy       | M | garden        | leaf |
| Canariensis [DP6A]          | canariensis | Gran Canaria     | California, USA      | ? | wild          | leaf |
| Atlantica [CAP1 POPMAL1]    | atlantica   | Maio I.          | Maio I.              | F | wild          | leaf |
| Atlantica [CAP50 BOA1]      | atlantica   | Boa Vista I.     | Boa Vista I.         | F | wild          | leaf |
| Reclinata [DP18]            | reclinata   | Rwanda           | California, USA      |   | USDA          | leaf |
| Theophrasti [THE83 91051]   | theophrasti | Crete, Greece    | Sanremo, Italy       | ? | garden        | leaf |
| Theophrasti [GOLK001 91020] | theophrasti | Golkoy, Turkey   | Sanremo, Italy       | ? | garden        | leaf |
| Theophrasti [02a]           | theophrasti | Epidaurus        | Epidaurus            | ? | putative wild | leaf |
| Theophrasti [05a]           | theophrasti | Epidaurus        | Epidaurus            | F | putative wild | leaf |
| Theophrasti [A1]            | theophrasti | White Lake       | White Lake           | ? | wild          | leaf |
| Theophrasti [A5]            | theophrasti | Chrisoskalitissa | Chrisoskalitissa     | F | wild          | leaf |
| Theophrasti [B1]            | theophrasti | Preveli          | Preveli              | F | wild          | leaf |
| Theophrasti [B3]            | theophrasti | Preveli          | Preveli              | ? | wild          | leaf |
| Theophrasti [B5]            | theophrasti | Preveli          | Preveli              | F | wild          | leaf |
| Theophrasti [C1]            | theophrasti | Maridaki         | Maridaki             | F | wild          | leaf |
| Theophrasti [C4]            | theophrasti | Maridaki         | Maridaki             | F | wild          | leaf |

|                  |             |         |         |   |      |      |
|------------------|-------------|---------|---------|---|------|------|
| Theophrasti [D1] | theophrasti | Vai     | Vai     | F | wild | leaf |
| Theophrasti [D3] | theophrasti | Vai     | Vai     | M | wild | leaf |
| Theophrasti [D5] | theophrasti | Vai     | Vai     | F | wild | leaf |
| Theophrasti [E1] | theophrasti | Almyros | Almyros | ? | wild | leaf |
| Theophrasti [E2] | theophrasti | Almyros | Almyros | ? | wild | leaf |
| Theophrasti [F1] | theophrasti | Drapano | Drapano | M | wild | leaf |
| Theophrasti [F2] | theophrasti | Drapano | Drapano | F | wild | leaf |

\*Internal identifiers are provided in brackets where applicable

<sup>a</sup>traditionally-recognized country of origin for the variety, cultivar, or uncultivated sample

<sup>b</sup>samples indicated as “garden” were sampled from ornamental gardens

<sup>c</sup>Date Palm Tissue Culture Laboratory, United Arab Emirates University, Al Ain, UAE

<sup>d</sup>United States Department of Agriculture, Thermal, California, USA

<sup>e</sup>Arizona State University Date Palm Collection, Tempe, AZ, USA

<sup>f</sup>Technical Center of Dates, Ministry of Agriculture, Kebili, Tunisia

<sup>g</sup>Department of Molecular Biology and Biotechnology, Atomic Energy Commission of Syria, Damascus, Syria

<sup>h</sup>International Center for Biosaline Agriculture, Dubai, UAE

<sup>i</sup>Date Palm Research Unit, College of Agriculture, University of Baghdad, Baghdad, Iraq

<sup>j</sup>Genomics Core Laboratory, Weill Cornell Medical College in Qatar, Doha, Qatar

<sup>k</sup>Date Palm Research Institute, Sindh, Pakistan

<sup>l</sup>sample information in Hazzouri et al. (2015) was incorrect

**Table S2. Sequencing and read alignment metrics.**

| sample <sup>a</sup>      | Reads     |          |                   | depth | coverage breadth <sup>b</sup> | mismatch rate <sup>c</sup> |
|--------------------------|-----------|----------|-------------------|-------|-------------------------------|----------------------------|
|                          | mapped    | unmapped | proportion mapped |       |                               |                            |
| Abel                     | 150525640 | 1717101  | 0.99              | 22.3  | 0.88                          | 0.01                       |
| Abouman                  | 263463003 | 3393585  | 0.99              | 37.88 | 0.89                          | 0.0098                     |
| Ajwa                     | 132578419 | 1620879  | 0.99              | 19.8  | 0.88                          | 0.0086                     |
| Alig                     | 141920612 | 1820595  | 0.99              | 20.95 | 0.88                          | 0.0103                     |
| Amir_haj                 | 352510217 | 8852814  | 0.98              | 49.57 | 0.89                          | 0.0094                     |
| Aseel                    | 160580565 | 3485016  | 0.98              | 23.69 | 0.89                          | 0.0108                     |
| Atlantica [CAP1 POPMAL1] | 195667937 | 2750604  | 0.99              | 28.95 | 0.88                          | 0.0153                     |
| Atlantica [CAP50 BOA1]   | 176266558 | 2649869  | 0.99              | 26.21 | 0.88                          | 0.0151                     |
| Aziza                    | 141765589 | 1841552  | 0.99              | 21.31 | 0.88                          | 0.0125                     |
| Azraq azraq              | 75701329  | 974123   | 0.99              | 11.76 | 0.88                          | 0.009                      |
| Barmel                   | 62519936  | 843094   | 0.99              | 9.77  | 0.87                          | 0.01                       |
| Began                    | 209037901 | 3351420  | 0.98              | 30.57 | 0.89                          | 0.0096                     |
| Besser haloo             | 160530252 | 2030261  | 0.99              | 22.85 | 0.88                          | 0.0101                     |
| Biddajaj                 | 187951211 | 3470057  | 0.98              | 27.47 | 0.88                          | 0.013                      |
| Boufkouss Rarass         | 66747320  | 919014   | 0.99              | 10.47 | 0.87                          | 0.0109                     |
| BouslKhine               | 76771594  | 1614322  | 0.98              | 11.99 | 0.87                          | 0.0105                     |
| Braim                    | 154146979 | 2285136  | 0.99              | 22.54 | 0.88                          | 0.0098                     |
| Canariensis [93115]      | 181999222 | 3793091  | 0.98              | 25.84 | 0.86                          | 0.0223                     |
| Canariensis [93116]      | 198573506 | 4089848  | 0.98              | 27    | 0.85                          | 0.022                      |
| Canariensis [93121]      | 180054559 | 3715100  | 0.98              | 26.13 | 0.86                          | 0.0219                     |
| Canariensis [DP6A]       | 100650053 | 1971197  | 0.98              | 14.71 | 0.83                          | 0.0183                     |
| Canariensis [JBMPL P3]   | 190496371 | 3831199  | 0.98              | 27.55 | 0.86                          | 0.022                      |
| Canariensis [JBMPL P9]   | 172643248 | 3211051  | 0.98              | 24.71 | 0.86                          | 0.0213                     |
| Chichi                   | 102551251 | 1076301  | 0.99              | 15.17 | 0.88                          | 0.0082                     |
| Dajwani                  | 69557483  | 913802   | 0.99              | 10.84 | 0.88                          | 0.0095                     |
| Dedhi                    | 80903437  | 1379916  | 0.98              | 12.51 | 0.88                          | 0.0088                     |
| Deglet_noor              | 137190335 | 1926557  | 0.99              | 20.37 | 0.88                          | 0.0103                     |
| Dibbas                   | 68088290  | 743069   | 0.99              | 10.04 | 0.87                          | 0.0085                     |
| Ebrahimi                 | 79483973  | 1281262  | 0.98              | 12.31 | 0.88                          | 0.0099                     |



|             |           |          |      |       |      |        |
|-------------|-----------|----------|------|-------|------|--------|
| Ewent_ayob  | 72542802  | 1048573  | 0.99 | 11.26 | 0.88 | 0.0097 |
| Fagous      | 122690639 | 2314674  | 0.98 | 18.45 | 0.88 | 0.0129 |
| Fard4       | 172547304 | 2388039  | 0.99 | 25.48 | 0.88 | 0.0093 |
| Faslee      | 170387024 | 1882082  | 0.99 | 25.44 | 0.89 | 0.0089 |
| Gajar       | 75888064  | 1128411  | 0.99 | 11.74 | 0.88 | 0.0089 |
| Halawy      | 169137087 | 1931453  | 0.99 | 29.16 | 0.89 | 0.0086 |
| Hamria      | 50541295  | 11005690 | 0.82 | 7.86  | 0.86 | 0.0095 |
| Hawawiri    | 69844164  | 1035048  | 0.99 | 10.83 | 0.87 | 0.0088 |
| Hayany      | 406488835 | 8789389  | 0.98 | 56.18 | 0.89 | 0.0099 |
| Helwa       | 94299676  | 1007866  | 0.99 | 13.93 | 0.88 | 0.0081 |
| Hilali      | 40604623  | 411689   | 0.99 | 6.26  | 0.85 | 0.0077 |
| Hiri        | 34289222  | 381182   | 0.99 | 5.26  | 0.83 | 0.0085 |
| Horra       | 156251978 | 2241102  | 0.99 | 22.67 | 0.88 | 0.0106 |
| Jao         | 148401276 | 1943698  | 0.99 | 22.51 | 0.88 | 0.0094 |
| Jihl        | 64114457  | 958979   | 0.99 | 10.08 | 0.87 | 0.0101 |
| Kabkab      | 58092939  | 503205   | 0.99 | 8.37  | 0.84 | 0.0091 |
| Kamla       | 63738218  | 938921   | 0.99 | 10.01 | 0.87 | 0.0109 |
| Karbali     | 179479963 | 3777412  | 0.98 | 26.62 | 0.89 | 0.0089 |
| Kashoowari  | 139019233 | 3777854  | 0.97 | 20.74 | 0.88 | 0.0091 |
| Khadrawy    | 184213949 | 2256609  | 0.99 | 27.12 | 0.89 | 0.0087 |
| Khalte      | 104310967 | 1594730  | 0.98 | 16.03 | 0.88 | 0.0106 |
| Khastawi    | 163887349 | 2225925  | 0.99 | 23.89 | 0.88 | 0.009  |
| Khenezi     | 179498132 | 2234006  | 0.99 | 25.55 | 0.88 | 0.0093 |
| Khisab      | 172731619 | 1899587  | 0.99 | 29.68 | 0.89 | 0.0092 |
| Kuproo      | 156202804 | 2893033  | 0.98 | 22.97 | 0.88 | 0.0097 |
| Lulu        | 155227536 | 2007456  | 0.99 | 22.51 | 0.88 | 0.0091 |
| Maktoumi    | 98832410  | 1513749  | 0.98 | 14.33 | 0.88 | 0.0095 |
| Manjouma    | 78983294  | 937515   | 0.99 | 12.19 | 0.88 | 0.0079 |
| Mazafati    | 250396814 | 3000638  | 0.99 | 36.83 | 0.89 | 0.009  |
| Medjool     | 119139190 | 1508631  | 0.99 | 18.06 | 0.88 | 0.0103 |
| Nagal       | 92313798  | 1282876  | 0.99 | 13.83 | 0.84 | 0.0111 |
| Naquel_khuh | 131153588 | 5536754  | 0.96 | 19.64 | 0.89 | 0.0085 |
| Nebeit_seif | 188301301 | 2086189  | 0.99 | 27.62 | 0.89 | 0.0113 |
| Otaquin     | 63805023  | 1014321  | 0.98 | 9.88  | 0.87 | 0.0086 |

|                            |           |         |      |       |      |        |
|----------------------------|-----------|---------|------|-------|------|--------|
| Piavom                     | 105409353 | 1336422 | 0.99 | 15.91 | 0.88 | 0.0091 |
| Rabee                      | 83212377  | 1085128 | 0.99 | 12.74 | 0.88 | 0.0089 |
| Raslatmar                  | 72563689  | 2521136 | 0.97 | 11.36 | 0.88 | 0.0106 |
| Reclinata [DP18]           | 81291572  | 1659108 | 0.98 | 12.34 | 0.84 | 0.0196 |
| Rhars                      | 162357815 | 2288204 | 0.99 | 23.96 | 0.89 | 0.0102 |
| Rothan                     | 150201486 | 2194572 | 0.99 | 22.44 | 0.88 | 0.0092 |
| Saidi                      | 142965921 | 1849339 | 0.99 | 20.92 | 0.88 | 0.0101 |
| Samany                     | 297430415 | 9150084 | 0.97 | 42.74 | 0.89 | 0.0097 |
| Shagri                     | 123694196 | 1550731 | 0.99 | 18.7  | 0.88 | 0.0091 |
| Silani                     | 110917413 | 1849289 | 0.98 | 16.76 | 0.89 | 0.0107 |
| Sultana                    | 163448822 | 2197739 | 0.99 | 23.82 | 0.88 | 0.0094 |
| Sylvestris [P59]           | 178874185 | 2967238 | 0.98 | 26.05 | 0.86 | 0.0201 |
| Sylvestris [RIV 2248 PL F] | 168214899 | 2904230 | 0.98 | 23.68 | 0.86 | 0.0191 |
| Sylvestris [RIV 2249 PL M] | 190588868 | 3373815 | 0.98 | 26.72 | 0.86 | 0.0203 |
| Sylvestris [RIV 2256 PL F] | 183684615 | 3078551 | 0.98 | 26.88 | 0.86 | 0.0189 |
| Sylvestris [RIV 7394 PI M] | 177363543 | 3040518 | 0.98 | 25.65 | 0.86 | 0.0193 |
| Sylvestris [RIV 7395 PL M] | 187297438 | 3212398 | 0.98 | 27.03 | 0.86 | 0.0194 |
| Sylvestris [SYL87 JCP 651] | 178271416 | 2558327 | 0.99 | 26.16 | 0.88 | 0.0158 |
| Tagiat                     | 227371304 | 2853356 | 0.99 | 33.52 | 0.88 | 0.0108 |
| Theophrasti [02a]          | 218870549 | 3589098 | 0.98 | 33.68 | 0.86 | 0.017  |
| Theophrasti [05a]          | 196875873 | 3295053 | 0.98 | 29.43 | 0.85 | 0.0167 |
| Theophrasti [A1]           | 133946661 | 2318399 | 0.98 | 21.12 | 0.85 | 0.0165 |
| Theophrasti [A5]           | 162169468 | 2553814 | 0.98 | 24.81 | 0.84 | 0.0162 |
| Theophrasti [B1]           | 186113518 | 3360918 | 0.98 | 28.87 | 0.85 | 0.0167 |
| Theophrasti [B3]           | 187302115 | 3485241 | 0.98 | 29.18 | 0.85 | 0.0169 |
| Theophrasti [B5]           | 186817680 | 3926283 | 0.98 | 28.76 | 0.85 | 0.017  |
| Theophrasti [C1]           | 199183167 | 3350046 | 0.98 | 30.49 | 0.85 | 0.0165 |
| Theophrasti [C4]           | 179182863 | 3167466 | 0.98 | 27.97 | 0.85 | 0.0164 |
| Theophrasti [D1]           | 188890651 | 3174149 | 0.98 | 29.1  | 0.85 | 0.0165 |
| Theophrasti [D3]           | 173475133 | 3077536 | 0.98 | 27.21 | 0.85 | 0.0167 |
| Theophrasti [D5]           | 196887547 | 3343095 | 0.98 | 30.5  | 0.85 | 0.0166 |
| Theophrasti [E1]           | 167492886 | 2891138 | 0.98 | 25.98 | 0.87 | 0.0158 |
| Theophrasti [E2]           | 210170838 | 3560309 | 0.98 | 32.74 | 0.86 | 0.0158 |
| Theophrasti [F1]           | 59381347  | 912539  | 0.98 | 9.53  | 0.82 | 0.0154 |

|                            |           |         |      |       |      |        |
|----------------------------|-----------|---------|------|-------|------|--------|
| Theophrasti [F2]           | 56127625  | 894886  | 0.98 | 9.11  | 0.82 | 0.0154 |
| Theophrasti[GOLK001 91020] | 184608035 | 3379240 | 0.98 | 26.88 | 0.87 | 0.0183 |
| Theophrasti [THE83 91051]  | 167090719 | 2964512 | 0.98 | 24.46 | 0.85 | 0.0193 |
| Thory                      | 148662341 | 2030735 | 0.99 | 21.68 | 0.88 | 0.0107 |
| Um al blaliz               | 78240760  | 1189431 | 0.99 | 12.14 | 0.88 | 0.01   |
| Um al hamam                | 110025473 | 1471829 | 0.99 | 16.63 | 0.88 | 0.0104 |
| Zagloul                    | 171154057 | 2003873 | 0.99 | 24.75 | 0.88 | 0.0107 |
| Zahidi                     | 293148570 | 8159624 | 0.97 | 41.82 | 0.89 | 0.0086 |

<sup>a</sup>internal identifiers are provided in brackets where applicable

<sup>b</sup>proportion of bases in reference genome covered by at least one read

<sup>c</sup>This column contains the “PF\_MISMATCH\_RATE” output from Picard CollectAlignmentSummaryMetrics

**Table S3.** Population statistics in cultivated date palm and its wild relatives. Statistics were estimated in non-overlapping 5 kb intervals using sample short read alignments as input to ANGSD. See SI Materials and Methods for additional details.

| Population            | $\theta_w$ (mean $\pm$ sd) | $\theta_w$ (median) | $\pi$ (mean $\pm$ sd) | $\pi$ (median) | Tajima'sD (mean $\pm$ sd) | Tajima' D (median) |
|-----------------------|----------------------------|---------------------|-----------------------|----------------|---------------------------|--------------------|
| Middle East           | 0.0083 (0.0058)            | 0.0067              | 0.0084 (0.0062)       | 0.0069         | 0.0645 (1.0554)           | 0.0221             |
| Egypt/Sudan           | 0.0095 (0.0067)            | 0.008               | 0.0098 (0.0072)       | 0.0081         | 0.1976 (1.3078)           | 0.2512             |
| North Africa          | 0.0106 (0.0069)            | 0.0087              | 0.0115 (0.0074)       | 0.0098         | 0.4513 (0.9883)           | 0.4273             |
| <i>P. sylvestris</i>  | 0.0094 (0.0088)            | 0.0064              | 0.0105 (0.0104)       | 0.0069         | 0.5221 (1.3851)           | 0.6663             |
| <i>P. theophrasti</i> | 0.0053 (0.0074)            | 0.002               | 0.0072 (0.0103)       | 0.0025         | 1.111 (1.2604)            | 1.1877             |
| <i>P. canariensis</i> | 0.0116 (0.0114)            | 0.0077              | 0.0117 (0.0134)       | 0.0064         | -0.5062 (1.4786)          | -0.3652            |

$\theta_w$  and  $\pi$  are per site estimates

**Table S4.** STRUCTURE analysis of *Phoenix* species with independent allele frequencies. Analyses were conducted with MCMC with burn in of 200,000 steps and chain lengths of 1,000,000 steps for K = 1-5 and 750,000 steps for K = 6-8.

| Species <sup>a</sup> | K | Reps | MeanLnP(K)  | Stdev      | LnP(K)    | Ln'(K)    | ΔK          |
|----------------------|---|------|-------------|------------|-----------|-----------|-------------|
| d,t,a,s,c            | 1 | 5    | -1936012.66 | 11.7343    | NA        | NA        | NA          |
| d,t,a,s,c            | 2 | 5    | -1432066.12 | 10.1593    | 503946.54 | 309836.02 | 30497.68037 |
| d,t,a,s,c            | 3 | 5    | -1237955.6  | 80.9156    | 194110.52 | 177584.12 | 2194.682398 |
| d,t,a,s,c            | 4 | 5    | -1221429.2  | 37475.5014 | 16526.4   | 50676.32  | 1.352252    |
| d,t,a,s,c            | 5 | 5    | -1154226.48 | 115.9024   | 67202.72  | 67206.14  | 579.85092   |
| d,t,a,s,c            | 6 | 5    | -1154229.9  | 75.6712    | -3.42     | 133.04    | 1.758133    |
| d,t,a,s,c            | 7 | 5    | -1154366.36 | 117.9535   | -136.46   | 236.5     | 2.005028    |
| d,t,a,s,c            | 8 | 5    | -1154266.32 | 233.6165   | 100.04    | NA        | NA          |

<sup>a</sup>*Phoenix* species included in analysis (c=*canariensis*, t=*theophrasti*, s=*sylvestris*, a=*atlantica*, d=*dactylifera*)

**Table S5.** STRUCTURE analysis of *Phoenix* species results with correlated allele frequencies. Analyses were conducted with MCMC with burn in of 200,000 steps and chain lengths of 1,000,000 steps for K = 1-5 and 750,000 steps for K = 6-8.

| Species <sup>a</sup> | K | Reps | MeanLnP(K)   | Stdev       | LnP(K)       | Ln'(K)      | ΔK          |
|----------------------|---|------|--------------|-------------|--------------|-------------|-------------|
| d,t,a,s,c            | 1 | 5    | -1935321.24  | 7.735179    | NA           | NA          | NA          |
| d,t,a,s,c            | 2 | 5    | -1402077.66  | 11.140153   | 533243.58    | 300385.88   | 26964.25181 |
| d,t,a,s,c            | 3 | 5    | -1169219.96  | 38.385974   | 232857.7     | 165484.52   | 4311.06737  |
| d,t,a,s,c            | 4 | 5    | -1101846.78  | 48572.62954 | 67373.18     | 11398.6     | 0.234671    |
| d,t,a,s,c            | 5 | 5    | -1023075     | 17227.20709 | 78771.78     | 41443506.4  | 2405.700831 |
| d,t,a,s,c            | 6 | 5    | -42387809.62 | 57781791.42 | -41364734.62 | 78717412.96 | 1.362322    |
| d,t,a,s,c            | 7 | 5    | -5035131.28  | 7645389.286 | 37352678.34  | 68929681.62 | 9.01585     |
| d,t,a,s,c            | 8 | 5    | -36612134.56 | 73687383.83 | -31577003.28 | NA          | NA          |

<sup>a</sup>*Phoenix* species included in analysis (c=*canariensis*, t=*theophrasti*, s=*sylvestris*, a=*atlantica*, d=*dactylifera*)

**Table S6.** Hierarchical STRUCTURE analysis with *Phoenix* species pairs. All analyses were conducted with MCMC chain lengths of 1,000,000 steps with burn in of 200,000.

| Species <sup>a</sup> | Model <sup>b</sup> | K | Reps | MeanLnP(K)  | Stdev       | LnP(K)    | Ln'(K)    | ΔK          |
|----------------------|--------------------|---|------|-------------|-------------|-----------|-----------|-------------|
| d,t                  | correlated         | 1 | 5    | -1382496.34 | 6.0665      | NA        | NA        | NA          |
| d,t                  | correlated         | 2 | 5    | -898512.58  | 5.7456      | 483983.76 | 447617.92 | 77906.11482 |
| d,t                  | correlated         | 3 | 5    | -862146.74  | 81.8886     | 36365.84  | 33791.36  | 412.650351  |
| d,t                  | correlated         | 4 | 5    | -859572.26  | 181.062     | 2574.48   | 4707.16   | 25.997502   |
| d,t                  | correlated         | 5 | 5    | -852290.62  | 192.5436    | 7281.64   | 79870.02  | 414.815303  |
| d,t                  | correlated         | 6 | 5    | -924879     | 179598.4296 | -72588.38 | NA        | NA          |
| d,t                  | independent        | 1 | 5    | -1382719.96 | 9.5981      | NA        | NA        | NA          |
| d,t                  | independent        | 2 | 5    | -924093.16  | 10.8992     | 458626.8  | 439922.06 | 40362.70978 |
| d,t                  | independent        | 3 | 5    | -905388.42  | 138.192     | 18704.74  | 18520.52  | 134.020158  |
| d,t                  | independent        | 4 | 5    | -905204.2   | 170.7       | 184.22    | 65.88     | 0.38594     |
| d,t                  | independent        | 5 | 5    | -905085.86  | 173.3255    | 118.34    | 72.86     | 0.420365    |
| d,t                  | independent        | 6 | 5    | -905040.38  | 270.0099    | 45.48     | NA        | NA          |
| d, s                 | correlated         | 1 | 5    | -1072630.06 | 14.3055     | NA        | NA        | NA          |
| d, s                 | correlated         | 2 | 5    | -910251.5   | 19.7673     | 162378.56 | 100871.78 | 5102.969467 |
| d, s                 | correlated         | 3 | 5    | -848744.72  | 8.697       | 61506.78  | 58995.94  | 6783.517938 |
| d, s                 | correlated         | 4 | 5    | -846233.88  | 319.7293    | 2510.84   | NA        | NA          |
| d, s                 | independent        | 1 | 5    | -1073323.54 | 9.0768      | NA        | NA        | NA          |
| d, s                 | independent        | 2 | 5    | -933198.8   | 19.2005     | 140124.74 | 110636.1  | 5762.140569 |
| d, s                 | independent        | 3 | 5    | -903710.16  | 96.3141     | 29488.64  | 29482.62  | 306.108957  |

|      |             |   |   |             |             |            |           |             |
|------|-------------|---|---|-------------|-------------|------------|-----------|-------------|
| d, s | independent | 4 | 5 | -903704.14  | 130.8617    | 6.02       | NA        | NA          |
| d, c | correlated  | 1 | 5 | -1145690.36 | 4.8911      | NA         | NA        | NA          |
| d, c | correlated  | 2 | 5 | -887905.46  | 11.5641     | 257784.9   | 199014.66 | 17209.72356 |
| d, c | correlated  | 3 | 5 | -829135.22  | 97.8919     | 58770.24   | 274468.48 | 2803.790371 |
| d, c | correlated  | 4 | 5 | -1044833.46 | 308448.6054 | -215698.24 | NA        | NA          |
| d, c | independent | 1 | 5 | -1146389.82 | 11.6106     | NA         | NA        | NA          |
| d, c | independent | 2 | 5 | -914142.86  | 24.4113     | 232246.96  | 208875.42 | 8556.495106 |
| d, c | independent | 3 | 5 | -890771.32  | 86.9131     | 23371.54   | 23480.9   | 270.165256  |
| d, c | independent | 4 | 5 | -890880.68  | 164.8779    | -109.36    | NA        | NA          |

<sup>a</sup>*Phoenix* species included in analysis (c=*canariensis*, t=*theophrasti*, s=*sylvestris*, d=*dactylifera*)

<sup>b</sup>allele frequency model



**Table S7.** Summary of D-tests of admixture in date palm and wild *Phoenix* species. Analysis is based on 800 kb or larger scaffolds. Population abbreviations are Rec=*P. reclinata*, Can=*P. canariensis*, The=*P. theophrasti*, Syl=*P. sylvestris*, Me= *P. dactylifera* (Middle East), Af= *P. dactylifera* (North Africa)

| D(P1,P2,P3,O) <sup>a</sup> | D(A,B;X,Y) <sup>b</sup> | <i>D</i> | SE     | Z-score  | Sites   | Blocks |
|----------------------------|-------------------------|----------|--------|----------|---------|--------|
| D(Me,Af,Can,Rec)           | D(Rec,Can;Me,Af)        | 0.0496   | 0.0076 | 6.5106   | 5201076 | 114    |
| D(Me,Af,The,Rec)           | D(Rec,The;Me,Af)        | 0.5795   | 0.0155 | 37.2416  | 5212567 | 114    |
| D(Me,Af,Syl,Rec)           | D(Rec,Syl;Me,Af)        | -0.1968  | 0.0107 | -18.2776 | 5200071 | 114    |
| D(Me,Af,The,Can)           | D(Can,The;Me,Af)        | 0.5750   | 0.0157 | 36.6246  | 5417214 | 114    |
| D(Me,Af,Syl,Can)           | D(Can,Syl;Me,Af)        | -0.2245  | 0.0109 | -20.5572 | 5401578 | 114    |
| D(Me,Eg,Can,Rec)           | D(Rec,Can;Me,Eg)        | 0.0229   | 0.0073 | 3.1205   | 5201001 | 114    |
| D(Me,Eg,The,Rec)           | D(Rec,The;Me,Eg)        | 0.3162   | 0.0274 | 11.5174  | 5212492 | 114    |
| D(Me,Eg,Syl,Rec)           | D(Rec,Syl;Me,Eg)        | -0.0713  | 0.0105 | -6.7544  | 5199996 | 114    |
| D(Me,Eg,The,Can)           | D(Can,The;Me,Eg)        | 0.3142   | 0.0275 | 11.4011  | 5417133 | 114    |
| D(Me,Eg,Syl,Can)           | D(Can,Syl;Me,Eg)        | -0.0853  | 0.0115 | -7.3725  | 5401497 | 114    |

<sup>a</sup>notation used in this manuscript (see main text and Supplementary Materials and Methods)

<sup>b</sup>notation adopted in Popstats

**Table S8.** Summary of  $f_3$  tests of admixture in *Phoenix*.

| Reference <sup>a</sup> | Reference | Test | $f_3$   | SE     | Z-score        | Sites   | Blocks |
|------------------------|-----------|------|---------|--------|----------------|---------|--------|
| Can                    | The       | Af   | 0.3940  | 0.0198 | 19.8481341554  | 5417214 | 114    |
| Can                    | Syl       | Af   | 0.3278  | 0.0106 | 30.8714085537  | 5401578 | 114    |
| Can                    | Me        | Af   | -0.0068 | 0.0044 | -1.53453598213 | 5426623 | 114    |
| The                    | Syl       | Af   | 0.1461  | 0.0144 | 10.1319179079  | 5420077 | 114    |
| The                    | Me        | Af   | -0.1547 | 0.0078 | -19.8010654255 | 5446954 | 114    |
| Syl                    | Me        | Af   | 0.0470  | 0.0047 | 9.98759435075  | 5429487 | 114    |
| Can                    | The       | Me   | 1.0501  | 0.0203 | 51.6515596788  | 5417215 | 114    |
| Can                    | Syl       | Me   | 0.6612  | 0.0144 | 45.8828550979  | 5401579 | 114    |
| Can                    | Af        | Me   | 0.2551  | 0.0121 | 20.9516945251  | 5426623 | 114    |
| The                    | Syl       | Me   | 0.6124  | 0.0142 | 43.0248181474  | 5420078 | 114    |
| The                    | Af        | Me   | 0.4693  | 0.0231 | 20.2505322114  | 5446954 | 114    |
| Syl                    | Af        | Me   | 0.1769  | 0.0084 | 20.9796711917  | 5429487 | 114    |
| Can                    | The       | Syl  | 1.4643  | 0.0510 | 28.7000406841  | 5392170 | 114    |
| Can                    | Af        | Syl  | 1.0216  | 0.0394 | 25.8832571533  | 5401578 | 114    |
| Can                    | Me        | Syl  | 0.9254  | 0.0367 | 25.1703221768  | 5401579 | 114    |
| The                    | Af        | Syl  | 1.3476  | 0.0503 | 26.7814032312  | 5420077 | 114    |
| The                    | Me        | Syl  | 0.9867  | 0.0371 | 26.5743008083  | 5420078 | 114    |
| Af                     | Me        | Syl  | 1.5257  | 0.0499 | 30.5289882338  | 5429487 | 114    |
| Can                    | Syl       | The  | 7.0383  | 0.3977 | 17.6945835456  | 5392170 | 114    |
| Can                    | Af        | The  | 5.6826  | 0.3282 | 17.3099792149  | 5417214 | 114    |
| Can                    | Me        | The  | 6.7754  | 0.3838 | 17.6509054061  | 5417215 | 114    |
| Syl                    | Af        | The  | 7.5278  | 0.4243 | 17.7397313993  | 5420077 | 114    |
| Syl                    | Me        | The  | 9.0215  | 0.4977 | 18.124694517   | 5420078 | 114    |
| Af                     | Me        | The  | 9.7511  | 0.5400 | 18.0561612535  | 5446954 | 114    |
| The                    | Syl       | Can  | 2.1101  | 0.1213 | 17.3814614312  | 5392170 | 114    |
| The                    | Af        | Can  | 2.5294  | 0.1383 | 18.2816038789  | 5417214 | 114    |
| The                    | Me        | Can  | 2.1915  | 0.1236 | 17.719634529   | 5417215 | 114    |
| Syl                    | Af        | Can  | 2.6749  | 0.1489 | 17.9615447772  | 5401578 | 114    |
| Syl                    | Me        | Can  | 2.7977  | 0.1537 | 18.1998852504  | 5401579 | 114    |

|    |    |     |        |        |               |         |     |
|----|----|-----|--------|--------|---------------|---------|-----|
| Af | Me | Can | 3.4463 | 0.1817 | 18.9582892881 | 5426623 | 114 |
| Af | Me | Eg  | 0.0111 | 0.0046 | 2.40519819898 | 5456282 | 114 |

<sup>a</sup>Species/population abbreviations (Can = *P. canariensis*, The = *P. theophrasti*, Syl = *P. sylvestris*, Af = North Africa, Me = Middle East)

**Table S9.** Summary of admixture modeling with *TreeMix*.

| Taxa <sup>a</sup> | root | m | block size (SNPs) | edge  | mixture weight <sup>b</sup> | % variance explained |
|-------------------|------|---|-------------------|-------|-----------------------------|----------------------|
| r,t,s,af,me       | r    | 0 | 1200              | -     | -                           | 0.9865042            |
| r,t,s,af,me       | r    | 1 | 1200              | t->af | 0.154444                    | 0.9996024            |
| r,t,s,af,me       | r    | 2 | 1200              | t->af | 0.159249                    |                      |
|                   |      |   |                   | r->s  | 0.0409515                   | 1                    |
| r,t,s,af,me       | r    | 0 | 2500              | -     | -                           | 0.9865042            |
| r,t,s,af,me       | r    | 1 | 2500              | t->af | 0.15467                     | 0.9996024            |
| r,t,s,af,me       | r    | 2 | 2500              | t->af | 0.159208                    |                      |
|                   |      |   |                   | s->r  | 0.0662112                   | 1                    |
| r,c,t,s,af,me     | r    | 0 | 1500              | -     | -                           | 0.9858358            |
| r,c,t,s,af,me     | r    | 1 | 1500              | t->af | 0.157475                    | 0.9988405            |
| r,c,t,s,af,me     | r    | 2 | 1500              | t->af | 0.154713                    |                      |
|                   |      |   |                   | s->r  | 0.139744                    | 0.9995955            |
| r,c,t,s,af,me     | r    | 0 | 3000              | -     | -                           | 0.9858358            |
| r,c,t,s,af,me     | r    | 1 | 3000              | t->af | 0.157475                    |                      |
| r,c,t,s,af,me     | r    | 2 | 3000              | t->af | 0.154713                    |                      |
|                   |      |   |                   | s->r  | 0.138765                    | 0.9995959            |

<sup>a</sup>Taxa included in model. Labels are r = *P. reclinata*, t = *P. theophrasti*, s = *P. sylvestris*, af = North Africa, me = Middle East

<sup>b</sup>Mixture weights for m = 2 are the weight of the two migration edges.

**Table S10.** Ancestry estimates by the  $f_4$ -ratio approach. Population abbreviations are Rec=*P. reclinata*, Can=*P. canariensis*, The=*P. theophrasti*, Syl=*P. sylvestris*, Me= *P. dactylifera* (Middle East), Af= *P. dactylifera* (North Africa)

| Ratio                                                      | $\alpha^*$ | SE     | Sites   | Blocks |
|------------------------------------------------------------|------------|--------|---------|--------|
| $f_4(\text{Syl,Can;Af,The})/f_4(\text{Syl,Can;Me,The})$    | 0.8212     | 0.0101 | 5392169 | 114    |
| $f_4(\text{Syl,Rec;Af,The})/f_4(\text{Syl,Rec;Me,The})$    | 0.8198     | 0.0105 | 5191207 | 114    |
| $f_4(\text{Syl,Can;Egypt,The})/f_4(\text{Syl,Can;Me,The})$ | 0.9474     | 0.0074 | 5392088 | 114    |
| $f_4(\text{Syl,Rec;Egypt,The})/f_4(\text{Syl,Rec;Me,The})$ | 0.9489     | 0.0077 | 5191132 | 114    |

\*estimates are based on scaffolds 800 kb or longer

**Table S11.** Summary of private alleles in date palm and its wild relatives. See SI Materials and Methods for definitions of private SNPs and private Fixations.

| Population                   | Private SNPs | SNPs    | % Private        | Private Fixations |
|------------------------------|--------------|---------|------------------|-------------------|
| Middle East (n=35)           | 738739       | 5493748 | 13.446903643924  | 0                 |
| North Africa (n=20)          | 390690       | 6844071 | 5.708444579257   | 0                 |
| <i>P. canariensis</i> (n=6)  | 1649668      | 3502073 | 47.1054715307191 | 327352            |
| <i>P. dactylifera</i> (n=55) | 3362180      | 7891182 | 42.606798322482  | 3842              |
| <i>P. reclinata</i> (n=1)    | 371400       | 622028  | 59.7079231160012 | 877042            |
| <i>P. sylvestris</i> (n=6)   | 1330458      | 3083543 | 43.1470551894363 | 156064            |
| <i>P. theophrasti</i> (n=13) | 162935       | 1024500 | 15.9038555392875 | 72760             |

## References

1. Stevens, CJ, Murphy, C, Roberts, R, Lucas, L, Silva, F., and Fuller, DQ (2016) Between China and South Asia: A Middle Asian corridor of crop dispersal and agricultural innovation in the Bronze Age. *The Holocene* 26(10):1541-1555.
2. De Vartavan, C. and Asensi Amoros, V. (1997) *Codex of Ancient Egyptian Plant Remains*. Triade exploration, London
3. Brewer, D. J., D. B. Redford, S. Redford (1994) Domestic plants and animals. The Egyptian Origins. Warminster: Aris and Phillips
4. M.A. Murray, M. A. (2000) Fruits, vegetables, pulses and condiments. In: P.T. Nicholson, I. Shaw (Eds.), *Ancient Egyptian Materials and Technology*, Cambridge University Press, Cambridge, pp. 609-655
5. Miller, Naomi F., Philip Jones, and Holly Pittman (2016) Sign and image: Representations of plants on the Warka Vase of early Mesopotamia. *Origini* 39: 53-73
6. Fuller, Dorian Q and Weber, Steven A. (2005) Formation Processes and Paleoethnobotanical Interpretation in South Asia. *Journal of Interdisciplinary Studies in History and Archaeology* 2(1): 91-114
7. Hazzouri KM, et al. (2015) Whole genome re-sequencing of date palms yields insights into diversification of a fruit tree crop. 2015. *Nat Commun* 6:8824.
8. Henderson et al. (2006) Genetic isolation of Cape Verde Island *Phoenix atlantica* (Arecaceae) revealed by microsatellite markers. *Conserv Genet* 7(2):213-223.
9. Al-Mssallem IS, et al. 2013. Genome sequence of the date palm *Phoenix dactylifera* L. *Nat Commun* 4:2274.
10. Fang Y, et al. (2012) A complete sequence and transcriptomic analyses of date palm (*Phoenix dactylifera* L.) mitochondrial genome. *PLoS ONE* 7(5): e37164.
11. Yang M, et al. (2010) The complete chloroplast genome sequence of date palm (*Phoenix dactylifera* L.). *PLoS ONE* 5(9): e12762
12. Bolger AM, Lohse M, Usadel B. (2014) Trimmomatic: a flexible trimmer for Illumina sequence data. *Bioinformatics* 30:2114-2120.
13. Li, H. 2013. Aligning sequence reads, clone sequences and assembly contigs with BWA-MEM. *arXiv:1303.3997v1* [q-bio.GN].
14. DePristo MA, et al. (2011) A framework for variation discovery and genotyping using next-generation DNA sequencing data. *Nat Genet* 43(5):491-498.
15. Li H, et al. (2009) The Sequence alignment/map (SAM) format and SAMtools. *Bioinformatics* 25:2078-9.
16. Poplin R, et al. (2017) Scaling accurate genetic variant discovery to tens of thousands of sample. *bioRxiv* doi:10.1101/201178.
17. Ramu P, et al. (2017) Cassava haplotype map highlights fixation of deleterious mutations during clonal propagation. *Nat Genet* 49:959-963.
18. Sabir JSM, et al. (2014) Whole mitochondrial and plastid genome SNP analysis of nine date palm cultivars reveals plastid heteroplasmy and close phylogenetic relationships among cultivars. *PLoS ONE* 9:e94158
19. Fang Y, Wu H, Zhang T, Yang M, Yin Y, Pan L, et al. (2012) A complete sequence and transcriptomic analyses of date palm (*Phoenix dactylifera* L.) mitochondrial genome. *PLoS ONE* 7(5): e37164. <https://doi.org/10.1371/journal.pone.0037164>
20. Yang M, et al. (2010) The complete chloroplast genome sequence of date palm (*Phoenix dactylifera* L.). *PLoS ONE*. 9:e12762.
21. Van der Auwera et al. (2013) From FastQ Data to High-Confidence Variant Calls: The Genome Analysis Toolkit Best Practices Pipeline. *Current Protocols in Bioinformatics*: John Wiley & Sons, Inc.
22. Stamatakis, A. (2014) Raxml version 8: a tool for phylogenetic analysis and post-analysis

- of large phylogenies. *Bioinformatics*, 30(9), 1312–1313.
23. Danecek P, et al. (2011). The Variant Call Format and VCFtools. *Bioinformatics* 27(15):2156-2158.
  24. Pritchard JK, Stephens M, Donnelly P. (2000) Inference of population structure using multilocus genotype data. *Genetics* 55:945-959.
  25. Earl, Dent A. and vonHoldt, BM (2012) STRUCTURE HARVESTER: a website and program for visualizing STRUCTURE output and implementing the Evanno method. *Conservation Genet Resources* 4(2):359-361.
  26. Green RE, Krause J, Briggs AW, et al. (2010) A draft sequence of the Neandertal genome. *Science* (56 co-authors). 328(5979):710-722.
  27. Durand EY, Patterson N, Reich D, Slatkin M. (2011) Testing for ancient admixture between closely related populations. *Mol Biol Evol* 28(8):2239–2252.
  28. Reich D, Thangaraj K, Patterson N, Price AL, Singh L (2009) Reconstructing Indian population history. *Nature* 461:489-494.
  29. Patterson N, et al. (2012) Ancient admixture in human history. *Genetics* 192:1065-1093.
  30. Peter BM (2016) Admixture, population structure, and F-statistics. *Genetics* 202:1485-1501.
  31. Pickrell JK, Pritchard JK. (2012) Inference of populations splits and mixtures from genome-wide allele frequency data. *PLoS Genet* 8(11): e1002967.
  32. Martin SH, Davey JW, Jiggins CD (2015) Evaluating the use of ABBA-BABA statistics to locate introgressed loci. *Mol Biol Evol* 32(1):244-257.
  33. Browning SR, Browning BL. (2007) Rapid and accurate haplotype phasing and missing-data inference for whole-genome association studies by use of localized haplotype clustering. *Am J Human Genet* 81(5):1084–1097
  34. Marroni F, et al. (2011) Nucleotide diversity and linkage disequilibrium in *Populus nigra* cinnamyl alcohol dehydrogenase (CAD4) gene. *Tree Genet Genomes* 7:1011-1023.
  35. Hill WG, Weir BS (1988) Variances and covariances of squared linkage disequilibria in finite populations. *Theor Popul Biol* 33:54-78.
