# Supplementary material for: Cross-species hybridization and the origin of North African date palms
Source: PubMed Central journal article supplement — Proc Natl Acad Sci U S A. 2019 Jan 14;116(5):1651–8. doi: 10.1073/pnas.1817453116 (PMC6358688; doi:10.1073/pnas.1817453116), 2019-01-14
Supplement: pnas.1817453116.sd01.pdf [file pnas.1817453116.sd01.pdf]

**Dataset S1.** Database of archaeological finds of *Phoenix* in African and Asia.

| Site                       | Country | Latitude   | Longitude  | GeoRef Quality | Sample Quality | Dating Quality | Broad Cultural Period | Start Date BC/AD | Finish Date BC/AD | Est. Date Median BC/AD | P. dactylifera | Phoenix spp. (wild) | Notes                                         | References                         |
|----------------------------|---------|------------|------------|----------------|----------------|----------------|-----------------------|------------------|-------------------|------------------------|----------------|---------------------|-----------------------------------------------|------------------------------------|
| Ġgġiliz                    | Morocco | 30.326369  | -7.956938  | 1              | 2              | AMS            | Medieval              | 900              | 1175              | 1037.5                 | Phd            |                     |                                               | Ruas et al 2011                    |
| Volubilis                  | Morocco | 34.070929  | -5.555345  | 3              | 3              | AMS            | Medieval              | 780              | 950               | 865                    | Phd            |                     |                                               | Fuller and Pelling 2018            |
| Volubilis                  | Morocco | 34.070929  | -5.555345  | 3              | 3              | AMS            | Classical             | -100             | 400               | 150                    | Phd            |                     |                                               | Fuller and Pelling 2018            |
| Sijilmasa                  | Morocco | 31.283807  | -4.276764  | 3              | 1              | ass            | Medieval              | 757              | 1393              | 1075                   | Phd            |                     |                                               | Fuller and Pelling 2018            |
| Gao Gadei                  | Mali    | 16.292563  | -0.036542  | 2              | 1              | C14            | Medieval              | 1000             | 1600              | 1300                   | Phd            |                     |                                               | Fuller 2000                        |
| Gao Saney                  | Mali    | 16.29262   | 0.016605   | 3              | 2              | C14            | Iron Age              | 700              | 1000              | 850                    | Phd            |                     |                                               | Gallagher 2011                     |
| Essouk                     | Mali    | 18.77103   | 1.186364   | 3              | 3              | ass            | Medieval              | 950              | 1400              | 1175                   | Phd            |                     |                                               | Nixon et al. 2011                  |
| Takarkori                  | Libya   | 24.538839  | 10.522417  | 2              | 2              | ass            | Neolithic             | -7000            | -6200             | -6600                  |                | (?)                 | Intrusive(?); uncharred P. dactylifera stones | Riviera et al 2014                 |
| Zinchechra                 | Libya   | 26.518281  | 13.033621  | 1              | 2              | C14            | 900-400 BC            | -900             | -400              | -650                   | Phd            |                     |                                               | Van der Veen 1992                  |
| Jarma                      | Libya   | 26.544246  | 13.062486  | 3              | 3              | AMS            | AD 100-500            | 100              | 500               | 300                    | Phd            |                     |                                               | Pelling 2005; 2007; 2008           |
| Jarma                      | Libya   | 26.544246  | 13.062486  | 3              | 3              | AMS            | AD 500-750            | 500              | 750               | 625                    | Phd            |                     |                                               | Pelling 2005; 2007; 2008           |
| Jarma                      | Libya   | 26.558567  | 13.114783  | 3              | 3              | AMS            | 400BC-AD 100          | -400             | 100               | -150                   | Phd            |                     |                                               | Pelling 2005; 2007                 |
| Kellis                     | Egypt   | 25.491486  | 28.978718  | 1              | 2              | ass            | Roman                 | 50               | 350               | 200                    | Phd            |                     |                                               | Thanheiser 2002                    |
| Douch                      | Egypt   | 25.38624   | 30.588632  | 1              | 1              | ass            | Classical             | 200              | 600               | 400                    | Phd            |                     |                                               | Barakat and Baum, 1992             |
| Arsinoe                    | Egypt   | 29.308374  | 30.844105  | 2              | 1              | ass            | Classical             | -30              | 300               | 135                    | Phd            |                     |                                               | De Vartavan and Asensi Amoros 1997 |
| Sheikh Abada (Antinopolis) | Egypt   | 27.8166667 | 30.8833333 | 2              | 1              | ass            | Late Antique          | 300              | 700               | 500                    | Phd            |                     |                                               | De Vartavan and Asensi Amoros 1997 |

|                         |       |            |            |   |   |     |                                |       |       |         |     |  |               |                                                             |
|-------------------------|-------|------------|------------|---|---|-----|--------------------------------|-------|-------|---------|-----|--|---------------|-------------------------------------------------------------|
| Kom el-Nana             | Egypt | 27.619404  | 30.88904   | 2 | 3 | ass | Late Antique                   | 500   | 650   | 575     | Phd |  |               | Smith, 2003                                                 |
| Antinopolis             | Egypt | 27.79639   | 30.894728  | 2 | 1 | ass | Classical                      | -330  | 300   | -15     | Phd |  |               | after Smith 2003<br>Table 3.5                               |
| Hawara                  | Egypt | 29.258026  | 30.896375  | 2 | 1 | ass | Ptolemic/Roman                 | -330  | 350   | 10      | Phd |  |               | Newberry 1889; De<br>Vartavan and<br>Asensi Amoros<br>1997  |
| Kom Aushim              | Egypt | 29.5177778 | 30.9033333 | 2 | 1 | ass | Classical                      | -330  | 300   | -15     | Phd |  |               | De Vartavan and<br>Asensi Amoros<br>1997                    |
| Amarna                  | Egypt | 27.661667  | 30.905556  | 2 | 2 | ass | Bronze Age                     | -1365 | -1345 | -1355   | Phd |  |               | Clapham and<br>Stevens 2009;<br>Stevens and<br>Clapham 2014 |
| Amarna                  | Egypt | 27.661667  | 30.905556  | 3 | 3 | ass | Bronze Age                     | -1345 | -1320 | -1332.5 | Phd |  |               | Clapham and<br>Stevens 2009;<br>Stevens and<br>Clapham 2014 |
| Dayr al-Barsha          | Egypt | 27.75156   | 30.91901   | 3 | 2 | ass | Late Antique                   | 400   | 800   | 600     | Phd |  |               | Marinova et al<br>2011                                      |
| el-Hibeh                | Egypt | 28.787423  | 30.921076  | 2 | 3 | ass | Late<br>Dynastic/Pto<br>lemaic | -1000 | -100  | -550    | Phd |  |               | Wetterstrom 1984                                            |
| Sedment<br>(Mayana)     | Egypt | 29.0856    | 30.9344    | 2 | 2 | ass | Bronze Age                     | -1675 | -1550 | -1612.5 | Phd |  |               | Brown, in De<br>Vartavan                                    |
| Sedment<br>(Mayana)     | Egypt | 29.0856    | 30.9344    | 2 | 1 | ass | Bronze Age                     | -1675 | -1550 | -1612.5 | Phd |  |               | Brown, in De<br>Vartavan                                    |
| Karanis                 | Egypt | 30.118921  | 31.134292  | 2 | 1 | ass | Roman                          | 250   | 450   | 350     | Phd |  |               | Bartlett, 1933;<br>Smith, 2003: Table<br>3.5                |
| Saqqara                 | Egypt | 29.87431   | 31.223255  | 2 | 1 | ass | Ptolemaic/Roman                | -330  | 350   | 10      | Phd |  |               | De Vartavan and<br>Asensi Amoros<br>1997                    |
| Saqqara AKT02           | Egypt | 29.87431   | 31.223255  | 2 | 3 | ass | Middle<br>Kingdom              | -1900 | -1785 | -1842.5 | Phd |  |               | Fahmy et al 2014                                            |
| Kom Ran'ia<br>[Memphis] | Egypt | 29.8447222 | 31.2508333 | 2 | 3 | ass | Bronze Age                     | -2060 | -1690 | -1875   | Phd |  |               | Murray 1990                                                 |
| Kom Ran'ia<br>[Memphis] | Egypt | 29.8447222 | 31.2508333 | 2 | 3 | ass | Bronze Age                     | -1550 | -1080 | -1315   | Phd |  |               | Murray 1990                                                 |
| El Omari                | Egypt | 29.880018  | 31.312967  | 2 | 3 | ass | Neolithic                      | -4600 | -4400 | -4500   | Phd |  | date could be | Tackholm 1990; De                                           |

|                              |       |            |            |   |   |     |              |       |       |         |     |  |           |                                                            |
|------------------------------|-------|------------|------------|---|---|-----|--------------|-------|-------|---------|-----|--|-----------|------------------------------------------------------------|
|                              |       |            |            |   |   |     |              |       |       |         |     |  | intrusive | Vartavan and Asensi Amoros 1997                            |
| Tell el Dab'a                | Egypt | 30.783     | 31.833     | 2 | 3 | AMS | Bronze Age   | -1880 | -1630 | -1755   | Phd |  |           | De Vartavan and Asensi Amoros 1997                         |
| Qasr Ibrim                   | Egypt | 22.649434  | 31.993007  | 3 | 2 | AMS | Classical    | -100  | 300   | 150     | Phd |  |           | Clapham and Rowley-Conwy 2007                              |
| Qasr Ibrim                   | Egypt | 22.649434  | 31.993007  | 3 | 2 | AMS | Iron Age     | -1000 | -300  | -650    | Phd |  |           | Clapham and Rowley-Conwy 2007                              |
| Qasr Ibrim                   | Egypt | 22.649434  | 31.993007  | 3 | 2 | AMS | Late Antique | 300   | 550   | 425     | Phd |  |           | Clapham and Rowley-Conwy 2007; Steele and Bunting 1982     |
| Minshat Abu Omar             | Egypt | 30.896839  | 32.04459   | 2 | 3 | ass | Predynastic  | -4000 | -2500 | -3250   | Phd |  |           | Thanheiser 1992                                            |
| Gebel Roma/ Wadi el-Hol A    | Egypt | 25.869902  | 32.145222  | 2 | 2 | ass | New Kingdom  | -1600 | -800  | -1200   | Phd |  |           | Cappers et al 2007                                         |
| Gebelein (Tomb of Ani)       | Egypt | 25.4833333 | 32.4833333 | 1 | 1 | ass | Bronze Age   | -2100 | -1990 | -2045   | Phd |  |           | Schweinfurth 1886: 260; De Vartavan and Asensi Amoros 1997 |
| Tutankhamun's tomb           | Egypt | 25.740436  | 32.601367  | 2 | 2 | ass | Bronze Age   | -1329 | -1327 | -1328   | Phd |  |           | De Vartavan 1990                                           |
| Deir el Medinah              | Egypt | 25.728406  | 32.60145   | 3 | 1 | ass | Bronze Age   | -1290 | -1080 | -1185   | Phd |  |           | Keimer 1947; De Vartavan and Asensi Amoros 1997            |
| Deir el Medineh (Kha's tomb) | Egypt | 25.728406  | 32.60145   | 3 | 1 | ass | Bronze Age   | -1550 | -1290 | -1420   | Phd |  |           | Breccia 1927; De Vartavan and Asensi Amoros 1997           |
| Deir el Bahari               | Egypt | 25.7383333 | 32.6077778 | 3 | 1 | ass | Bronze Age   | -1070 | -945  | -1007.5 | Phd |  |           | Scheinfurth 1884; De Vartavan and Asensi Amoros 1997       |
| Dier el Bahari               | Egypt | 25.7383333 | 32.6077778 | 3 | 1 | ass | Bronze Age   | -1524 | -1503 | -1513.5 | Phd |  |           | De Vartavan and Asensi Amoros 1997                         |

|                     |       |            |            |   |   |     |                        |       |       |       |     |  |  |                                                            |
|---------------------|-------|------------|------------|---|---|-----|------------------------|-------|-------|-------|-----|--|--|------------------------------------------------------------|
| Dra Abu el Naga     | Egypt | 25.7352778 | 32.6205556 | 2 | 1 | ass | Bronze Age             | -1990 | -1800 | -1895 | Phd |  |  | Schweinfurth 1885: 260; De Vartavan and Asensi Amoros 1997 |
| Phoebammon          | Egypt | 25.737902  | 32.621978  | 1 | 1 | ass | Late Antuque           | 400   | 700   | 550   | Phd |  |  | Smith 2003: Table 3.5; De Vartavan and Asensi Amoros 1997  |
| Thebes              | Egypt | 25.713593  | 32.657302  | 2 | 1 | ass | Bronze Age             | -1290 | -1190 | -1240 | Phd |  |  | Costantini 1985                                            |
| Hierakonpolis       | Egypt | 25.091377  | 32.774584  | 2 | 2 | C14 | Bronze Age             | -3000 | -2250 | -2625 | Phd |  |  | De Vartavan and Asensi Amoros 1997                         |
| Wadi Qitna          | Egypt | 23.532492  | 32.862896  | 1 | 1 | ass | Late Antuque           | 300   | 400   | 350   | Phd |  |  | Strouhal 1984: 262-263; Fuller 2015                        |
| Elephantine         | Egypt | 24.084982  | 32.885768  | 3 | 2 | ass | Bronze Age             | -1070 | -650  | -860  | Phd |  |  | Willdering and Wolf, 1991; Smith, 2003: Table 3.5          |
| Elephantine         | Egypt | 24.084982  | 32.885768  | 3 | 2 | ass | Ptolamic/Roman         | -330  | 350   | 10    | Phd |  |  | Willdering and Wolf, 1991; Smith, 2003: Table 3.5          |
| Mons Claudianus     | Egypt | 26.8091667 | 33.4869444 | 2 | 3 | ass | Roman                  | 150   | 300   | 225   | Phd |  |  | van der Veen 2001                                          |
| Bir Umm Fawakhir    | Egypt | 26.0013889 | 33.6083333 | 3 | 3 | ass | Late Antique           | 400   | 600   | 500   | Phd |  |  | Smith 2014                                                 |
| Abu Sha'ar          | Egypt | 27.438595  | 33.649209  | 2 | 1 | ass | Late Antique           | 300   | 700   | 500   | Phd |  |  | Sidebotham et al. 1989                                     |
| Quseir al-Qadim     | Egypt | 26.156149  | 34.242563  | 3 | 3 | AMS | Medieval               | 1000  | 1300  | 1150  | Phd |  |  | Van der Veen 2011                                          |
| Quseir al-Qadim     | Egypt | 26.156149  | 34.242563  | 3 | 3 | AMS | Roman, 1-250 AD        | 1     | 250   | 125   | Phd |  |  | Van der Veen 2011                                          |
| Berenike            | Egypt | 23.910194  | 35.476079  | 3 | 3 | ass | Classical              | 1     | 200   | 100.5 | Phd |  |  | Cappers, 2006                                              |
| Berenike            | Egypt | 23.910194  | 35.476079  | 3 | 3 | ass | Late Antique           | 300   | 500   | 400   | Phd |  |  | Cappers, 2006                                              |
| EL Hamra (EH-4-008) | Sudan | 19.298664  | 30.177232  | 2 | 2 | ass | Medieval               | 700   | 1300  | 1000  | Phd |  |  | Madani et al. 2015                                         |
| Nauri               | Sudan | 19.76      | 30.37      | 3 | 2 | ass | Late Christian (Nubia) | 800   | 1200  | 1000  | Phd |  |  | Fuller and Edwards 2001                                    |
| Kawa                | Sudan | 19.126537  | 30.496467  | 3 | 3 | AMS | Iron Age               | -800  | -400  | -600  | Phd |  |  | Fuller 2004                                                |

|                  |              |           |           |   |    |     |                |       |       |       |     |  |                                                        |
|------------------|--------------|-----------|-----------|---|----|-----|----------------|-------|-------|-------|-----|--|--------------------------------------------------------|
| NDRS: P1         | Sudan        | 19.048623 | 30.600042 | 2 | 1  | ass | Bronze Age     | -2050 | -1500 | -1775 | Phd |  | Cartwright 2001                                        |
| NDRS: P37        | Sudan        | 19.048623 | 30.600042 | 2 | 1  | ass | Bronze Age     | -2050 | -1500 | -1775 | Phd |  | Cartwright 2001                                        |
| Semna temples    | Sudan        | 21.482115 | 30.96398  | 2 | 1  | ass | Middle Kingdom | -1500 | -1480 | -1490 | Phd |  | Van Zeist 1983                                         |
| Debeira West     | Sudan        | 22.152614 | 31.36637  | 2 | 1  | ass | Medieval       | 600   | 900   | 750   | Phd |  | Shinnie and Shinnie 1978; Fuller 2015                  |
| Abdallah Nirqi   | Sudan        | 22.400373 | 31.675738 | 2 | 1  | ass | Medieval       | 600   | 900   | 750   | Phd |  | Skoflek and Arendas 1981; Fuller 2015                  |
| Meroe            | Sudan        | 16.93658  | 33.71106  | 3 | 1  | ass | Classical      | 100   | 350   | 225   | Phd |  | Shinnie and Anderson 2004: 366; Fuller 2015            |
| Madā' in Sâlih   | Saudi Arabia | 26.791290 | 37.955561 | 2 | 3  | ass | Classical      | 1     | 100   | 50.5  | Phd |  | Bouchaud 2013                                          |
| Madā' in Sâlih   | Saudi Arabia | 26.791290 | 37.955561 | 2 | 3  | ass | Classical      | -200  | 0     | -100  | Phd |  | Bouchaud 2013                                          |
| Madā' in Sâlih   | Saudi Arabia | 26.791290 | 37.955561 | 2 | 3  | ass | Classical      | 100   | 300   | 200   | Phd |  | Bouchaud 2013                                          |
| Madā' in Sâlih   | Saudi Arabia | 26.791290 | 37.955561 | 2 | 3  | ass | Late Antique   | 300   | 600   | 450   | Phd |  | Bouchaud et al 2011; Bouchaud 2013                     |
| al-Raqlah        | Yemen        | 15.299621 | 44.662617 | 2 | 2? | ass | Bronze Age     | -3000 | -2500 | -2750 | Phd |  | Costantini, 1990; Bovin and Fuller, 2009               |
| Baraqish         | Yemen        | 15.992910 | 44.800678 | 1 | 1i | C14 | Iron Age       | -700  | -100  | -400  | Phd |  | Constantini 1986; Boivin and Fuller 2009               |
| Hajar al-Rayhani | Yemen        | 15.073073 | 45.297248 | 3 | 2? | ass | Iron Age       | -500  | -200  | -350  | Phd |  | Stewart 1996; Bovin and Fuller 2009                    |
| Hajar al-Tamrah  | Yemen        | 15.024531 | 45.304357 | 2 | 2? | ass | Iron Age       | -1100 | -400  | -750  | Phd |  | Stewart 1988; Bovin and Fuller 2009                    |
| H3, Sabiyah      | Kuwait       | 29.581504 | 48.106195 | 1 | 1  | C14 | Neolithic      | -5530 | -5320 | -5425 | Phd |  | Beech 2003; Parker 2010                                |
| Failaka          | Kuwait       | 29.465586 | 48.291191 | 2 | 3  | ass | Bronze Age     | -2050 | -1800 | -1925 | Phd |  | Rowley-Conwy 1987; Willcox 1990; Bovin and Fuller 2009 |

|                     |                      |           |           |   |    |         |              |       |       |       |     |  |  |                                                                  |
|---------------------|----------------------|-----------|-----------|---|----|---------|--------------|-------|-------|-------|-----|--|--|------------------------------------------------------------------|
| Failaka             | Kuwait               | 29.465586 | 48.291191 | 2 | 3  | ass     | Hellenistic  | -300  | 400   | 50    | Phd |  |  | Rowley-Conwy 1987; Willcox 1990; Boivin and Fuller 2009          |
| Raybun (Hadhramaut) | Yemen                | 15.265911 | 48.335342 | 2 | 2? | C14     | Iron Age     | -900  | 0     | -450  | Phd |  |  | LevKovskaya and Filatenko 1992; Boivin and Fuller 2009           |
| Saar                | Bahrain              | 26.181871 | 50.486619 | 3 | 3  | ass     | Bronze Age   | -2500 | -1800 | -2150 | Phd |  |  | Nesbitt 1993; Boivin and Fuller 2009                             |
| Qal'at al Bahrein   | Bahrain              | 26.233820 | 50.520923 | 3 | 3  | ass     | Bronze Age   | -2200 | -1750 | -1975 | Phd |  |  | Tenberg and Lombard 2001                                         |
| Qal'at al Bahrein   | Bahrain              | 26.233820 | 50.520923 | 3 | 3  | ass     | Bronze Age   | -1450 | -1350 | -1400 | Phd |  |  | Tenberg and Lombard 2001                                         |
| Qal'at al Bahrein   | Bahrain              | 26.233820 | 50.520923 | 3 | 3  | ass     | Bronze Age   | -1000 | -500  | -750  | Phd |  |  | Tenberg and Lombard 2001                                         |
| Qal'at al Bahrein   | Bahrain              | 26.233820 | 50.520923 | 3 | 3  | ass     | Iron Age     | -300  | 300   | 0     | Phd |  |  | Tenberg and Lombard 2001                                         |
| Dalma               | United Arab Emirates | 24.469316 | 52.312011 | 2 | 1  | AMS PhD | Chalcolithic | -5300 | -4960 | -5130 | Phd |  |  | Beech and Shepherd 2001; Boivin and Fuller 2009                  |
| Umm An-Nar          | United Arab Emirates | 24.438873 | 54.512479 | 2 | 3  | ass     | Bronze Age   | -2500 | -2000 | -2250 | Phd |  |  | Willcox 1995; Boivin and Fuller 2009                             |
| Muweilah            | United Arab Emirates | 25.273885 | 55.487594 | 1 | 3  | C14     | Iron Age     | -800  | -600  | -700  | Phd |  |  | Tenberg 1998; Boivin and Fuller 2009                             |
| Rumeilah            | United Arab Emirates | 25.273885 | 55.487594 | 1 | 2? | C14     | Iron Age     | -1150 | -350  | -750  | Phd |  |  | Constantini and Constantini-Biasini 1986; Boivin and Fuller 2009 |
| Tell Abraq          | United Arab Emirates | 25.487467 | 55.551999 | 2 | 3  | C14     | Bronze Age   | -2500 | -2000 | -2250 | Phd |  |  | Willcox and Tenberg 1995; Tenberg 1998; Boivin and Fuller 2009   |
| Tell Abraq          | United Arab Emirates | 25.487467 | 55.551999 | 2 | 3  | C14     | Bronze Age   | -2000 | -1650 | -1825 | Phd |  |  | Willcox and Tenberg 1995; Tenberg 1998; Boivin and Fuller        |

|               |                      |            |            |   |      |     |                 |       |       |         |     |         |            |                                                               |
|---------------|----------------------|------------|------------|---|------|-----|-----------------|-------|-------|---------|-----|---------|------------|---------------------------------------------------------------|
|               |                      |            |            |   |      |     |                 |       |       |         |     |         |            | 2009                                                          |
| Tell Abraç    | United Arab Emirates | 25.487467  | 55.551999  | 2 | 3    | C14 | Bronze Age      | -1650 | -1300 | -1475   | Phd |         |            | Willcox and Tenberg 1995; Tenberg 1998; Bovin and Fuller 2009 |
| Tell Abraç    | United Arab Emirates | 25.487467  | 55.551999  | 2 | 3    | C14 | Iron Age        | -1300 | -400  | -850    | Phd |         |            | Willcox and Tenberg 1995; Tenberg 1998; Bovin and Fuller 2009 |
| Ed Dur        | United Arab Emirates | 25.521603  | 55.626569  | 3 | 1 ph | ass | Classical       | -50   | 250   | 100     | Phd |         | Phytoliths | Vrydaghs et al 2001; De Paepe et al 2003                      |
| Hili 8        | United Arab Emirates | 24.292728  | 55.794150  | 1 | 1i   | C14 | Bronze Age      | -3000 | -2000 | -2500   | Phd |         |            | Cleuziou and Constantini 1982; Bovin and Fuller 2009          |
| Mleiha        | United Arab Emirates | 25.126370  | 55.856616  | 1 | 3    | C14 | Iron Age        | 1     | 200   | 100.5   | Phd |         |            | Peña-Chocarro & Barron Lopez 1999; Bovin and Fuller 2009      |
| Nud Zida      | United Arab Emirates | 25.615228  | 55.992321  | 2 | 1    | C14 | Bronze Age      | -2130 | -1885 | -2007.5 | Phd |         |            | Kennet and Velde, 1995                                        |
| Kush          | United Arab Emirates | 25.822778  | 56.007139  | 3 | 2    | ass | 12-13th Century | 1100  | 1400  | 1250    | Phd |         |            | Ishida et al. 2003; Tengberg 2012                             |
| Kush          | United Arab Emirates | 25.822778  | 56.007139  | 3 | 2    | ass | 17th Century    | 1600  | 1700  | 1650    | Phd |         |            | Ishida et al. 2003; Tengberg 2012                             |
| Bat           | Oman                 | 23.272630  | 56.742536  | 1 | 3    | C14 | Bronze Age      | -2500 | -2000 | -2250   | Phd |         |            | Tenberg, 1998; Bovin and Fuller, 2009                         |
| Ras al-Jinz 2 | Oman                 | 22.363123  | 59.822813  | 1 | 2?   | C14 | Bronze Age      | -2500 | -2100 | -2300   | Phd |         |            | Constantini and Audisio 2001; Bovin and Fuller 2009           |
| Tell Gerisa   | Israel               | 32.0999985 | 34.7799988 | 2 | 2    | ass | Bronze Age      | -2100 | -1550 | -1825   | Phd |         |            | Lipshitz, 1989                                                |
| Atlit-Yam     | Israel               | 32.7108278 | 34.93515   | 3 | 2/3  | ams | Pre-Pottery     | -7250 | -6550 | -6900   |     | P.theop |            | Kislev et al 2004                                             |

|                     |                         |            |            |   |   |           | Neolithic             |       |       |       |     | hrasti             |  |                                                 |
|---------------------|-------------------------|------------|------------|---|---|-----------|-----------------------|-------|-------|-------|-----|--------------------|--|-------------------------------------------------|
| Timna temples       | Israel                  | 29.7877778 | 34.9888889 | 2 | 3 | ass./hist | Bronze Age            | -1550 | -1080 | -1315 | Phd |                    |  | Kislev 1988; De Vartavan and Asensi Amoros 1997 |
| Masada              | Israel                  | 31.315556  | 35.353889  | 3 | 3 | ass       | Iron Age              | -1000 | -300  | -650  | Phd |                    |  | Lipshitz and Lev-Yadun 1989                     |
| Masada              | Israel                  | 31.315556  | 35.353889  | 3 | 3 | ass       | Iron Age              | 1     | 100   | 50.5  | Phd |                    |  | Sallon et al 2008                               |
| Nahal Mishmar       | Israel                  | 31.4200001 | 35.3800011 | 2 | 1 | ass       | Chalcolithic          | -4500 | -3200 | -3850 | Phd |                    |  | Zaitschek 1980                                  |
| Jericho (EBA)       | Palestinian Territories | 31.85      | 35.45      | 2 | 2 | ass       | Bronze Age            | -3200 | -2000 | -2600 | Phd |                    |  | Hopf 1983                                       |
| Khirbet Qumran cave | Israel                  | 31.7408333 | 35.4586111 | 2 | 1 | ass       | Classical             | -100  | 200   | 50    | Phd |                    |  | Lipshitz and Bonani 2001                        |
| Wadi Fidan          | Jordan                  | 30.8299999 | 35.5       | 1 | 3 | ass       | Chalcolithic          | -4500 | -3200 | -3850 | Phd |                    |  | Colledge, 2001; Meadows 1996                    |
| Ras an-Numayra      | Jordan                  | 31.5       | 35.57      | 2 | 2 | C14       | Bronze Age            | -3350 | -2190 | -2770 | Phd |                    |  | White et al. 2014                               |
| Pella               | Jordan                  | 32.45      | 35.616667  | 2 | 2 | ass       | Iron Age              | -1200 | -900  | -1050 | Phd |                    |  | Dighton et al. 2017                             |
| Tuleilat Ghassul    | Jordan                  | 31.75      | 35.6199989 | 1 | 1 | C14       | Chalcolithic          | -4800 | -4250 | -4525 | Phd |                    |  | Zohary and Spiegel-Roy 1975                     |
| Khirbat al-Mudaybi  | Jordan                  | 31.028759  | 35.77903   | 1 | 2 | ass       | Medieval              | 1000  | 1600  | 1300  | Phd |                    |  | Bogaard and Charles 1999                        |
| el-Lejjun           | Jordan                  | 31.241427  | 35.890415  | 2 | 3 | C14       | Classical             | 280   | 370   | 325   | Phd |                    |  | Crawford 1987                                   |
| Ain Ghazal          | Jordan                  | 31.98      | 35.97      | 2 | 3 | C14       | Pre-Pottery Neolithic | -8300 | -6600 | -7450 |     | cf. P. theophrasti |  | Rollefson et al., 1985                          |
| Bosra               | Syria                   | 32.516564  | 36.480327  | 2 | 2 | ass       | Classical             | -100  | 300   | 100   | Phd |                    |  | Willcox, 2003                                   |
| Qaryat Medad        | Syria                   | 35.166658  | 40.343635  | 2 | 3 | ass       | Islamic               | 750   | 1400  | 1075  | Phd |                    |  | Samuel 2001                                     |
| Shheil              | Syria                   | 35.070622  | 40.502971  | 2 | 3 | ass       | Islamic               | 650   | 900   | 775   | Phd |                    |  | Samuel 2001                                     |
| Tell Karrana        | Iraq                    | 36.7200012 | 42.9199982 | 1 | 2 | C14       | Chalcolithic          | -3100 | -2940 | -3020 | Phd |                    |  | Costantini and Costantini Biasini 1993          |
| Tell ed-Der         | Iraq                    | 33.0999985 | 44.2999992 | 2 | 2 | ass       | Bronze Age            | -1900 | -1700 | -1800 | Phd |                    |  | Van Zeist & Vynckier 1984                       |
| Eridu               | Iraq                    | 30.7800007 | 45.0200005 | 2 | 1 | ass       | Chalcolithic          | -5300 | -3800 | -4550 | Phd |                    |  | Gillet, 1976                                    |
| Nippur              | Iraq                    | 32.126444  | 45.233381  | 3 | 1 | ass       | Bronze Age            | -2200 | -2000 | -2100 | Phd |                    |  | Ellison 1978;                                   |



|                            |            |            |            |   |   |     |                |       |       |       |     |  |  |                                                                    |
|----------------------------|------------|------------|------------|---|---|-----|----------------|-------|-------|-------|-----|--|--|--------------------------------------------------------------------|
|                            |            |            |            |   |   |     |                |       |       |       |     |  |  | Langlois 2011                                                      |
| Larsa                      | Iraq       | 31.285833  | 45.853611  | 2 | 2 | ass | Iron Age       | -650  | 50    | -300  | Phd |  |  | Neef 1989                                                          |
| Tell el'Oueili             | Iraq       | 31.2199993 | 45.8699989 | 1 | 2 | C14 | Neolithic      | -6400 | -6100 | -6250 | Phd |  |  | Neef, 1991                                                         |
| Tell el'Oueili             | Iraq       | 31.2199993 | 45.8699989 | 1 | 2 | C14 | Chalcolithic   | -5800 | -4400 | -5100 | Phd |  |  | Neef 1991                                                          |
| Ur                         | Iraq       | 30.9699993 | 46.1500015 | 3 | 1 | ass | Bronze Age     | -3200 | -2100 | -2650 | Phd |  |  | Ellison et al. 1978;<br>Miller 1991                                |
| Susa, Ville Royale         | Iran       | 32.189760  | 48.259487  | 2 | 3 | ass | Iron Age       | -750  | -600  | -675  | Phd |  |  | Miller 1981                                                        |
| Susa, Ville Royale         | Iran       | 32.189760  | 48.259487  | 2 | 3 | ass | Early Historic | -5    | 100   | 47.5  | Phd |  |  | Miller 1981                                                        |
| Tepe Gaz Tavila            | Iran       | 28.308600  | 56.631860  | 1 | 1 | ass | Neolithic      | -5400 | -4800 | -5100 | Phd |  |  | Costantini 1985                                                    |
| Tepe Yahya                 | Iran       | 28.330833  | 56.8675    | 3 | 1 | ass | Neolithic      | -5500 | -5000 | -5250 | Phd |  |  | Costantini and<br>Costantini Biasini<br>1995                       |
| Tepe Yahya                 | Iran       | 28.330833  | 56.8675    | 3 | 1 | ass | Bronze Age     | -3400 | -2200 | -2800 | Phd |  |  | Costantini and<br>Costantini Biasini<br>1995                       |
| Konur (Konar) Sandal North | Iran       | 28.463247  | 57.778756  | 1 | 3 | C14 | Iron Age       | -1000 | -500  | -750  | Phd |  |  | Mashkour et al.<br>2013                                            |
| Konur (Konar) Sandal South | Iran       | 28.449575  | 57.778849  | 1 | 3 | C14 | Bronze Age     | -2800 | -2200 | -2500 | Phd |  |  | Mashkour et al.<br>2013                                            |
| Shahr-i-Sokhta             | Iran       | 30.647614  | 61.424412  | 2 | 2 | ass | Bronze Age     | -3000 | -2000 | -2500 | Phd |  |  | Costantini and<br>Biasini 1985;<br>Costantini 1985;<br>Miller 1991 |
| Sarazm                     | Tajikistan | 39.512499  | 67.443373  | 2 | 3 | ass | Bronze Age     | -2600 | -2000 | -2300 | Phd |  |  | Spengler and<br>Willcox 2013                                       |
| Miri Qalat                 | Pakistan   | 26.033722  | 63.012738  | 2 | 3 | C14 | Chalcolithic   | -4000 | -3500 | -3750 | Phd |  |  | Tengberg 1999                                                      |
| Miri Qalat                 | Pakistan   | 26.033722  | 63.012738  | 2 | 3 | C14 | Chalcolithic   | -3500 | -3000 | -3250 | Phd |  |  | Tengberg 1999                                                      |
| Miri Qalat                 | Pakistan   | 26.033722  | 63.012738  | 2 | 3 | C14 | Bronze Age     | -3000 | -2500 | -2750 | Phd |  |  | Tengberg 1999                                                      |
| Miri Qalat                 | Pakistan   | 26.033722  | 63.012738  | 2 | 3 | C14 | Bronze Age     | -2500 | -2000 | -2250 | Phd |  |  | Tengberg 1999                                                      |
| Mehrgarh                   | Pakistan   | 29.416667  | 67.583333  | 2 | 1 | C14 | Neolithic      | -7000 | -4500 | -5750 | Phd |  |  | Costantini 1983;<br>Costantini &<br>Costantini Biasini<br>1985     |
| Nausharo                   | Pakistan   | 29.366667  | 67.583333  | 2 | 3 | C14 | Bronze Age     | -2500 | -2000 | -2250 | Phd |  |  | Costantini 1990a                                                   |

|                  |          |           |           |   |   |     |                |       |       |       |     |                   |               |                                                                                    |
|------------------|----------|-----------|-----------|---|---|-----|----------------|-------|-------|-------|-----|-------------------|---------------|------------------------------------------------------------------------------------|
| Harappa          | Pakistan | 30.627756 | 72.866816 | 3 | 2 | C14 | Bronze Age     | -2600 | -2200 | -2400 | Phd |                   |               | Miller & Reddy 1990; Weber 1997; 2003; Pennington and Weber 2004; Weber et al 2010 |
| Harappa          | Pakistan | 30.627756 | 72.866816 | 3 | 2 | C14 | Bronze Age     | -2200 | -1900 | -2050 | Phd |                   |               | Miller & Reddy 1990; Weber 1997; 2003; Pennington and Weber 2004; Weber et al 2010 |
| Harappa          | Pakistan | 30.627756 | 72.866816 | 3 | 2 | C14 | Bronze Age     | -1900 | -1700 | -1800 | Phd |                   |               | Miller & Reddy 1990; Weber 2003; Pennington and Weber 2004; Weber et al 2010       |
| Inamgaon         | India    | 18.608060 | 74.549440 | 3 | 3 | C14 | Chalcolithic   | -1200 | -900  | -1050 |     | P. sylvestris     |               | Kajale 1988; Vishnu-Mittre 1977                                                    |
| Inamgaon         | India    | 18.608060 | 74.549440 | 3 | 3 | C14 | Chalcolithic   | -1500 | -1200 | -1350 |     | P. sylvestris     |               | Kajale 1988                                                                        |
| Banawali         | India    | 29.598309 | 75.392369 | 2 | 2 | ass | Harappan       | -2500 | -1500 | -2000 |     | P. sylvestris     |               | Saraswat, 2002b                                                                    |
| Balu             | India    | 29.670830 | 76.387780 | 2 | 2 | ass | Harappan       | -2500 | -1900 | -2200 |     | P. cf. sylvestris | fragment only | Saraswat, 2002a                                                                    |
| Sanghol          | India    | 30.786510 | 76.390180 | 3 | 2 | ass | Early Historic | 100   | 300   | 200   | Phd |                   |               | Pokharia and Saraswat 1999; Saraswat 1997                                          |
| Narhan           | India    | 26.357500 | 83.534170 | 2 | 2 | C14 | Chalcolithic   | -1300 | -800  | -1050 |     | P. sylvestris     |               | Saraswat et al. 1994                                                               |
| Raja-Nal-ka-Tila | India    | 24 41.55  | 83 19.26  | 2 | 2 | ass | Iron Age       | -1300 | -700  | -1000 |     | P. sylvestris     |               | Pokharia et al 2016                                                                |
| Rohira           | India    | 30.633333 | 75.833333 | 2 | 2 | ass | Pre-Harappan   | -2900 | -2500 | -2700 | Phd | P. cf. sylvestris | uncharred     | Saraswat 1986                                                                      |

## Dataset S1 References

- Beech, M. (2003). Archaeobotanical Evidence for Early Date Consumption in the Arabian Gulf. In: The Emirates Center for Strategic Studies and Research (ed.) *The date Palm – from Traditional Resource to Green Wealth*. The Emirates Center for Strategic Studies and Research, Abu Dhabi (2003), pp. 11–31
- Beech M. & Shepherd, E. (2001). Archaeobotanical evidence for early date consumption on Dalma Island, United Arab Emirates. *Antiquity* 75: 83–89.
- Bogaard, A. and Charles, M. (1999). Addendum: Summary of Archaeobotanical Work at al-Mudaybi'. *Annual of the Department of Antiquities of Jordan* 43: 140-143
- Boivin, N., & Fuller, D. Q. (2009). Shell middens, ships and seeds: Exploring coastal subsistence, maritime trade and the dispersal of domesticates in and around the ancient Arabian Peninsula. *Journal of World Prehistory* 22(2): 113-180.
- Bouchaud, C., Tengberg, M., & Dal Prà, P. (2011). Cotton cultivation and textile production in the Arabian Peninsula during antiquity; the evidence from Madâ'in Sâlih (Saudi Arabia) and Qal'at al-Bahrain (Bahrain). *Vegetation history and archaeobotany*, 20(5), 405-417.
- Bouchaud, C. (2013). Exploitation végétale des oasis d'Arabie. Production, commerce et utilisation des plantes. L'exemple de Madâ'in Sâlih (Arabie Saoudite) entre le ive siècle av. J.-C. et le viie siècle apr. J.-C. *Revue d'Ethnoécologie* 4 : DOI : 10.4000/ethnoecologie.1217
- Breccia, E. (1927) La Missione Archeologica Italiana in Egitto e la tomba intatta dell'Architetto Cha. *Emporium* 66 (393): 1-18
- Brewer, D. J., D. B. Redford, S. Redford (1994) Domestic plants and animals. The Egyptian Origins. Warminster: Aris and Phillips
- Cappers, R. (2006). *Roman foodprints at Berenike: Archaeobotanical evidence of subsistence and trade in the Eastern Desert of Egypt*. L.A.. California: Costen Institute of Archaeology, UCLA Los Angeles.
- Cappers, R. J. T., Sikking, L., Darnell, J. C. and Darnell, D. (2007) Food supply along the Theban Desert roads (Egypt): the Gebel Roma', Wadi el-Hôl and Gebel Qarn el-Gir caravansary deposits. In: Cappers, R. J. T. (ed.) *Fields of Change: Progress in African Archaeobotany*. Pp. 127-138
- Cartwright, C. (1998). The plant remains, in: D. Welsby (ed.), *Life on the Desert Edge. Seven thousand years of settlement in the Northern Dongola Reach, Sudan II*, Oxford, 556-567
- Cartwright, C. (2001). The plant remains. In: D. Welsby (ed.), *Life on the Desert Edge. Seven thousand years of settlement in the Northern Dongola Reach, Sudan II*, British Archaeological Reports, Oxford, pp. 556-567.

- Clapham AJ, Stevens CJ (2009) Dates and confused: does measuring date stones make any sense? In: Ikram S, Dodson A (eds) *Beyond the Horizon: Studies in Egyptian Art, Archaeology and History in Honour of Barry J. Kemp*. Supreme Council of Antiquities, Cairo, pp 9-27
- Cleuziou, S. and L. Constantini (1982) À l'origine des oasis. *La Recherche* 13/137: 1179-1182
- Colledge S (2001) Plant Exploitation on Epipalaeolithic and Early Neolithic Sites in the Levant (British Archaeological Report, Oxford).
- Costantini, L. (1983). The beginning of agriculture in the Kachi Plain: The evidence from Mehrgarh. In B. Allchin (Ed.), *South Asian archaeology 1981*. Cambridge: Cambridge University Press
- Costantini, L. (1985) Considerazioni su alcuni reperti di palma da dattero e sul centro di origine e l'area di coltivazione della *Phoenix dactylifera* L. In : G. Gnoli, S. Lanciotti (Eds.), *Orientalia Josephi Tucci Memoriae Dicata*, Rome, pp. 209-218
- Costantini, L. (1990). Harrapan agriculture in Pakistan: The evidence of Nausharo. In M. Taddei (Ed.), *South Asian archaeology 1987* (pp. 321–332). Rome: Istituto Italiano per il Medio ed Estremo Oriente.
- Costantini L, Audisio P (2000) Plant and insect remains from the Bronze Age site of Ra's al-Jinz (RJ-2), Sultanate of Oman. *Paleorient* 26(1): 143-156
- Costantini, L. and Costantini Biasini, L. (1983). The Plant Remains. In G. Wilhelm and C. Zaccagnini (eds.) *Tell Karrana 3, Tell Jikan, Tell Khirbet Salih*. Forschungen 15, Philipp von Zabern, Mainz am Rhein, pp. 237-250
- Costantini, L. and Costantini Biasini, L. (1985). Palaeoethnobotanical Studies of Prehistoric Settlements in Soughun and Dowlatabad Valleys, Iran. *Newsletter of Baluchistan Studies* (Istituto Universitario Orientale, Naples) 2: 16-23
- Costantini, L and Costantini-Biasini, L. (1986). Palaeobotanical investigations in the Middle East and the Arabian Peninsula. *East and West* 36/4: 354-365
- Crawford, P. (1987). Food for a Roman Legion: The Plant Remains from el-Lejjun. In: Parker, S. T. (ed.) *The Roman Frontier in Central Jordan, Interim Report on the Limes Arabicus Project, 1980-1985*, British Archaeological Reports (International Series 340), Oxford, pp. 691-704.
- De Vartavan, C. (1990). Contaminated plant-foods from the tomb of Tutankhamun: A new interpretive system. *Journal of Archaeological Science*, 17(5), 473-494.
- De Vartavan, C. and Asensi Amoros, V. (1997). *Codex of Ancient Egyptian Plant Remains*. Triade exploration, London
- Ellison, R., Renfrew, J., Brothwell, D., & Seeley, N. (1978). Some food offerings from Ur, excavated by Sir Leonard Woolley, and previously unpublished. *Journal of Archaeological Science* 5(2): 167-177.

- Fahmy, A. G., Kawai, N., and Yoshimura, S. (2014). Archaeobotany of two Middle Kingdom cult chambers at Northwest Saqqara, Egypt. In: Stevens, C., Nixon, S., Murray, M., & Fuller, D. Q. (eds.) *Archaeology of African Plant Use*. Left Coast Press, Walnut Creek, pp. 141-150
- Fernández, V.M. (1983) La cultura alto-meroítica del norte de Nubia. La necrópolis de Amir-Abdallah, 2 vols., PhD Dissertation, Universidad de Madrid, Madrid
- Firth, C.M. (1927) *The Archaeological Survey of Nubia. Report for 1910-1911*, Cairo
- Fuller, D. (2000). The Botanical Remains, in T Insoll (ed). *Urbanism, Archaeology and Trade. Further Observations on the Gao Region (Mali). The 1996 Fieldseason Results*. British Archaeological Reports (International Series 829), Oxford, pp. 28-35.
- Fuller, D. (2004) Early Kushite Agriculture: Archaeobotanical Evidence from Kawa. *Sudan & Nubia* 8: 70-74.
- Fuller DQ (2015) The economic basis of the Qustul splinter state: cash crops, subsistence shifts and labour demands in the Post-Meroitic transition. In: Zach MH (ed) *The Kushite World. Proceedings of the 11th International Conference for Meroitic Studies*, Vienna, 1–4 September 2008. Beiträge zur Sudanforschung Beiheft 9. Verein der Förderer der Sudanforschung, Vienna, pp 33–60
- Fuller, D. and D. N. Edwards (2001). Medieval Plant Economy in Middle Nubia: Preliminary Archaeobotanical Evidence from Nauri, *Sudan and Nubia* 5: 97-103
- Fuller, DQ and Pelling, R. (2018). Plant Economy: Archaeobotanical Studies. In: Fentress, E. and Limane, H. (eds.) *Volubilis après Rome. Les fouilles UCL/INSAP, 2000-2005*. Koninklijke Brill, Leiden, pp. 329-348 [ISBN 978-90-04-37149-1, in press]
- Fuller, Dorian Q and Weber, Steven A. (2005). Formation Processes and Paleoethnobotanical Interpretation in South Asia. *Journal of Interdisciplinary Studies in History and Archaeology* 2(1): 91-114
- Gallagher D (2011) Palaeobotanical remains. In: Cissé M, *Archaeological Investigations of Early Trade and Urbanism at Gao Saney (Mali)*. Ph.D. dissertation, Rice University, Houston, p. 350–354
- Gillet J. B. (1976) Botanical Samples. In : F. Safar et al (ed) *Eridu*. Baghdad : Ministry of Culture and Information, pp. 317-318.
- Ishida, S., Parker, A. G., Kennet, D., & Hodson, M. J. (2003). Phytolith analysis from the archaeological site of Kush, Ras al-Khaimah, United Arab Emirates. *Quaternary Research* 59(3) : 310-321.
- Kajale, M. D. (1988). Plant economy. In M. K. Dhavalikar, H.D. Sankalia, & Z.D. Ansari (Eds.), *Excavations at Inamgaon*. Deccan College Postgraduate and Research Institute, Pune, pp. 727–821.
- Keimer, L. (1947) Plusiers antiquites recemment trouvees. *Bulletin de L'Institute d'Egypte* 28: 117-137

Kennet, D and Velde, C. (1995). Third and early second-millennium occupation at Nud Ziba, Khatt (UAE). *Arabian Archaeology and Epigraphy* 6(2): 81-89.

Kislev, M. E. (1988) Fruit remains. In: Rothenberg, B. (ed.) *The Egyptian Mining Temple at Timna*. Institute for Archaeo-metallurgical studies, Institute of Archaeology, London, pp. 236-241

Kislev, M. E., Hartmann, A., & Galili, E. (2004). Archaeobotanical and archaeoentomological evidence from a well at Atlit-Yam indicates colder, more humid climate on the Israeli coast during the PPNC period. *Journal of Archaeological Science* 31: 1301–1310.

Kunth, C. (1826) Recherche sur les plantes trouvees dan les tombeaux egyptiens par M. Passalacqua. *Annales des Sciences Naturelles* 8: 418-423

Levkovskaya, G. M., & Filatenko, A. A. (1992). Palaeobotanical and palynological studies in South Arabia. *Review of palaeobotany and palynology*, 73(1-4), 241-257.

Liphschitz, N. (1989). Plant economy and diet in the Early Bronze Age in Israel: A summary of present research. In: Miroshedji, P. d. (ed.) *L'urbanisation de la Palestine a l'age du Bronze ancien. Bilan et perspectives des recherches actuelles*. British Archaeological Reports International Series, Oxford, pp. 269 - 277

Liphschitz, N. and Lev-Yadun, S. (1989). The Botanical Remains from Masada: Identification of the Plant Species and the Possible Origin of the Remnants. *Bulletin of the American School of Oriental Research* 274: 27-32.

Liphschitz N, Bonani G (2001) Wild and Cultivated Date Palm (*Phoenix dactylifera*) from Qumran Cave 24. *Tel Aviv* 28:305–309

Madani, I., Tahir, Y. F., Hamdeen, H. M. (2015) Plant Macro-remains Recovered from El-Hamra Christian Complex Excavation in El-Ga'ab Depression, Sudan. *Sudan and Nubia* 19 : 143-148

Mashkour, M., Tengberg, M., Shirazi, Z., & Madjidzadeh, Y. (2013). Bio-archaeological studies at Konar Sandal, Halil Rud basin, southeastern Iran. *Environmental Archaeology* 18(3) : 222-246.

Meadows, J. (1996). The final straw: an archaeobotanical investigation of the economy of a fourth millennium BC site in the Wadi Fidan, southern Jordan. M. Sc. Thesis. University of Sheffield, Sheffield.

Miller, N. F. (1981). Plant Remains from Ville Royale II, Susa. *Cahiers de la Délégation Archéologique Française en Iran* 12: 137-142.

Miller, Naomi F., Philip Jones, and Holly Pittman (2016). Sign and image: Representations of plants on the Warka Vase of early Mesopotamia. *Origini* 39: 53-73

- Murray, M. A. (1990) Archaeobotany [in Memphis 1989]. *Journal of Egyptian Archaeology* 76: 14
- M.A. Murray, M. A. (2000) Fruits, vegetables, pulses and condiments. In: P.T. Nicholson, I. Shaw (Eds.), *Ancient Egyptian Materials and Technology*, Cambridge University Press, Cambridge, pp. 609-655
- Neef, R (1991) Plant remains from archaeological sites in lowland Iraq: Tell el'Oueili. In: J.-L. Huot (Ed.), *Oueili. Travaux de 1985*, Éditions Recherche sur les Civilisations, Paris, pp. 322-329
- Nesbitt, M. (1993). Archaeobotanical evidence for early Dilmun diet at Saar, Bahrain. *Arabian Archaeology and Epigraphy* 4(1), 20-47.
- Newberry, P. E. (1889) On the vegetable remains discovered in the cemetery of Hawara. In: Petrie, W. M. F. (ed.) *Hawara, Bahnu and Arsinoe*. The Leadenhall Press, London, pp. 46-53
- Nixon, S., Murray, M. A., & Fuller, D. Q. (2011). Plant use at an early Islamic merchant town in the West African Sahel: the archaeobotany of Essouk-Tadmakka (Mali). *Vegetation History and Archaeobotany* 20(3), 223-239.
- Parker, A.G. (2010) Paleoenvironmental evidence from H3, Kuwait. In: R. Carter, H. Crawford (Eds.), *Maritime Interactions in the Arabian Neolithic. Evidence from H3, As-Sabiyah, an Ubaid-related Site in Kuwait*. Brill, Harvard, pp. 187-199
- Pelling, R. (2005). Garamantian agriculture and its significance in a wider North African context: The evidence of the plant remains from the Fazzan project. *The Journal of North African Studies* 10(3-4): 397-412.
- Pelling, R. (2007) Agriculture and trade amongst the Garamantes: 3000 years of archaeobotanical data from the Sahara and its margins, PhD Dissertation, Institute of Archaeology, University College, London.
- Pelling, R. (2008). Garamantian agriculture: the plant remains from Jarma, Fazzan. *Libyan Studies* 39: 41-71.
- Peña-Chocarro, L. & E. Barron Lopez (1999). Plant remains from the site of Mleiha U.A.E. In : M. Mouton (Ed.), *Mleiha I - Environnements, Stratégies de Subsistance et Artisanats*. Travaux de la Maison de l'Orient Méditerranéen 29, Maison de l'Orient Méditerranéen, Lyon, pp. 63-69
- Petrie, F. and Brunton, G. (1924) *Sedment*. British School of Archaeology, Egyptian Research Account, London.
- Pokharia, A. and Saraswat, K. (1999). Plant economy during KUshana period (100-300 AD) at Sanghol, Punjab. *Pragdhara* 9: 75-121
- Rivera D, Obon C, García-Arteaga J et al (2014) Carpological analysis of Phoenix (Arecaceae): contributions to the taxonomy and evolutionary history of the genus. *Bot J Linn Soc* 175:74–122

- Rollefson, G. O., A. H. Simmons, M. L. Donaldson, W. Gillepsie, Z. Kafafi, I. Kohler-Rollefson, E. McAdam, S. L. Rolston and M. K. Tubb (1985). Excavation at the Pre-Pottery Neolithic B Village of 'Ain Ghazal (Jordan), 1983. *Mitteilungen der Deutschen Orientgesellschaft zu Berlin* 117: 69-116
- Ruas, M. P., Tengberg, M., Ettahiri, A. S., Fili, A., & Van Staëvel, J. P. (2011). Archaeobotanical research at the medieval fortified site of Îgîlîz (Anti-Atlas, Morocco) with particular reference to the exploitation of the argan tree. *Vegetation history and archaeobotany* 20(5) : 419-433.
- Rowley-Conwy, P. (1987). Remains of date (*Phoenix dactylifera*) from Failaka, Kuwait. In: F. Højlund (Ed.) *Danish archaeological investigations on Failaka, Kuwait. The second millenium settlements*, 2, Jutland Archaeological Society Publications XVII (2), Aarhus, pp. 181-183.
- Sallon, S., Solowey, E., Cohen, Y., Korchinsky, R., Egli, M., Woodhatch, I., ... & Kislev, M. (2008). Germination, genetics, and growth of an ancient date seed. *Science* 320(5882) : 1464-1464.
- Samuel D (2001) Archaeobotanical evidence and analysis. In: Berthier S (ed) *Peuplement rural et aménagements hydroagricoles dans la moyenne vallée de l'Euphrate fin VIIe-XIXe siècle*. Institut Français d'Etudes Arabes de Damas, Damascus, pp.343-481
- Sajjadi, S. M. S., Casanova, M., Costantini, L., & Lorentz, K. O. (2008). Sistan and Baluchistan Project: Short reports on the tenth campaign of excavations at Shahr-i Sokhta. *Iran* 46(1) : 307-334.
- Saraswat, K. S. (1997). Plant Economy of Barans at Ancient Sanghol (Ca. 1900–1400 B.C.), Punjab. *Pragdhara (Journal of the U. P. State Archaeology Department)* 7: 97–114.
- Saraswat, K. S. (2002a). Balu (29°40'N; 76°22'E), District Kaithal. *Indian Archaeology 1996–1997–A Review*: 198–203
- Saraswat, K. S. (2002b). Banawali (29°37'5"N; 75°23'6"E), District Hissar. *Indian Archaeology 1996–1997–A Review*: 203.
- Saraswat, K. S., Sharma, N. K., & Saini, D. C. (1994). Plant Economy ay Ancient Narhan (Ca. 1,300 B.C.–300/400 A.D.). In P. Singh (Ed.), *Excavations at Narhan (1984–1989)* (pp. 255–346). Varanasi: Banaras Hindu University.
- Säve-Söderbergh, T., G. Englund and H.-A. Nordström (1981) *Late Nubian Cemeteries*, The Scandinavian Joint Expedition vol. 6, Copenhagen-Oslo-Stockholm
- Schweinfurth, G. (1884) Further discoveries in the Flora of Ancient Egypt. *Nature* 29 : 312-315
- Schweinfurth, G. (1885). Notice sur les restes vegetaux de l'ancienne Egypte. Contenus dans une armoire du Musee de Boulaq. *Bulletin de l'Institut Egyptien* (2<sup>nd</sup> ser.) 5 : 3-10



- Schweinfurth, G. (1886). Les dernières découvertes botaniques dans les anciens tombeaux de l'Égypte. *Bulletin de l'Institut Égyptien* (2<sup>nd</sup> ser.) 6 : 256-283
- Shinnie, P.L. and J. Anderson (2004) *The capital of Kush 2: Meroe excavations, 1973-1984*, Meroitica 20, Wiesbaden
- Shinnie, P.L. and M. Shinnie (1978) *Debeira West. A Mediaeval Nubian Town*, University of Ghana Expedition to Nubia, Warminster
- Sidebotham, S. E., Riley, J. A., Hamroush, H. A., & Barakat, H. (1989). Fieldwork on the Red Sea coast: the 1987 season. *Journal of the American Research Center in Egypt*, 26, 127-166.
- Skoflek, I. and V. Arendas (1981) Abdallah Nirqi 1964. Plant remains from the Nubian excavation, *Mitteilungen des Archäologischen Instituts der Ungarischen Akademie der Wissenschaften* 10/11: 215-219
- Smith, W. (2003). *Archaeobotanical investigations of agriculture at Late Antique Kom el-Nana (Tell el-Amarna)*. Egyptian Exploration Society, London
- Smith, W. (2014) Floral remains. In: Bir Um Fawakir 3. Excavations 1999-2001 [OIP 141]. University of Chicago, Oriental Institute, Chicago, pp. 97-110
- Spengler, R. N., & Willcox, G. (2013). Archaeobotanical results from Sarazm, Tajikistan, an Early Bronze Age Settlement on the edge: Agriculture and exchange. *Environmental Archaeology*, 18(3), 211-221.
- Stevens, C. J. and Clapham, A. J. (2014). Botanical insights into the life of an ancient Egyptian village: excavation results from Amarna. In: Stevens, C., Nixon, S., Murray, M., & Fuller, D. Q. (eds.) *Archaeology of African Plant Use*. Left Coast Press, Walnut Creek, pp. 151-164
- Stevens, C. J., Murphy, C., Roberts, R., Lucas, L., Silva, F., & Fuller, D. Q. (2016). Between China and South Asia: A Middle Asian corridor of crop dispersal and agricultural innovation in the Bronze Age. *The Holocene*, 26(10), 1541-1555.
- Stewart, R. (1987). Appendix 4. Botanical remains. In Glanzman, W., and Ghaleb, A. O. (eds.), *The Wadi al-Jubah Archaeological Project, Vol. 3. Site Reconnaissance in the Yemen Arab Republic, 1984: Stratigraphic Probe at Hajar ar-Rayhani*, The American Foundation for the Study of Man, Washington, DC, pp. 162–163
- Stewart, R. B. (1988) Plant resources of the Wadi al-Jubah. In: Overstreet, W. C., Grolier, M. J. and Toplyn, M. R. (eds) *The Wadi Al-Jubah Archaeological Project, Volume 4.* American Foundation for the Study of Man, Washington, D.C., pp. 105-110
- Stewart, R. (1996). Summarized species list for the botanical remains excavated in 1987 at Hajar ar-Rayhani, Yemen Arab Republic. In: Overstreet, W., and Blakely, J. (eds.), *Environmental Research in Support of Archaeological Investigations in the Yemen Arab Republic, 1982–1987*, American Foundation for the Study of Man, Washington, DC, p. 299

- Strouhal, E. (1984) *Wadi Qitna and Kalabsha-South. Late Roman – Early Byzantine Tumuli Cemeteries in Egyptian Nubia I: Archaeology*, Prague
- Tackholm, V. (1990) Botanical examination. In: Debono, F and Mortensen, B. (eds.) *El Omari. A Neolithic settlement and other sites in the vicinity of Wadi Hof, Helwan*. Verlag Philipvan Zabern, Mainz Am Rhein, pp. 115-116
- Tengberg, M. (1998). Paléoenvironnements et économie végétale en milieu aride – recherches archéobotaniques dans la région du Golfe arabo-persique et dans le Makran pakistanais (4<sup>ème</sup> millénaire av. notre ère – 1<sup>er</sup> millénaire de notre ère). PhD thesis, University of Montpellier 2
- Tengberg, M. (1999). Crop husbandry at Miri Qalat Makran, SW Pakistan (4000–2000 BC). *Vegetation History and Archaeobotany* 8(1-2): 3-12.
- Tengberg, M. (2012). Beginnings and early history of date palm garden cultivation in the Middle East. *Journal of Arid Environments*, 86, 139-147.
- Tengberg, M., & Lombard, P. (2001). Environnement et économie végétale à Qal'at al-Bahreïn aux périodes Dilmoun et Tylos. Premiers éléments d'archéobotanique. *Paléorient* 27(1): 167-181.
- Thanheiser, U. (2002). Plant Remains from Kellis: First Results, in: C.A. Hope and A.J. Mills (eds.), *Dakhleh Oasis Project: Preliminary Reports on the 1992-1993 and 1993-1994 Field Seasons*, Oxford, 89-103
- Thanheiser, U. (1992) Plant remains from Minshat Abu Omar: First impressions. In: van den Brink, E. C. M. (ed.) *The Nile Delta in transition: 4<sup>th</sup>-3<sup>rd</sup> Millennium B.C.* The Israel Exploration Society, Jerusalem, pp. 167-170
- Van der Veen, M. (1992). Garamantian agriculture: the plant remains from Zinhecra, Fezzan. *Libyan Studies* 23 : 7-39.
- Van der Veen 2001 (2001) The botanical evidence. In V. A. Maxfield and D. P. S. Peacock (Eds.), *Survey and Excavation at Mons Claudianus, 1987–1993*, Vol. 2. Institut Français d'Archéologie Orientale, Cairo, pp. 175–247.
- Van der Veen, M. (2011). *Consumption, trade and innovation: Exploring the botanical remains from the Roman and Islamic ports at Quseir al-Qadim, Egypt*. Frankfurt: Africa Magna.
- Van Ziest, W. A. (1983) 1983 Fruits in Foundation Deposits of Two Temples, *Journal of Archaeological Science* 10: 351-354
- Van Zeist, W., & Vynckier, J. (1984). Palaeobotanical investigations of Tell ed-Der. In: De Meyer, L. (ed.) *Telle ed-Der IV*. Uitgeverij Peeters, Leuven, pp. 119-43.
- Vishnu-Mittre (1977). Changing economy in ancient India. In C. A. Reed (Ed.), *Origins of agriculture* (pp. 569–588). Paris: Mouton.

- Vrydaghs, L., Doutrelpont, H., Beeckman, H., Haerinck, E., Meunier, J. D., & Colin, F. (2001). Identifications of a morphotype association of *Phoenix dactylifera* L. lignified tissues origin at ed-Dur (1st AD), Umm al-Qaiwain (UAE). In: Meunier JD, Colin F (eds). *Phytoliths in Earth Sciences and Human History*, AA Balkema: Rotterdam, 239-250.
- Wetterstrom, W. (1984) The plant remains. In: Wenke, R.J. (ed.) *Archaeological Investigations at El-Hibeh 1980: Preliminary Report*. American Research Center in Egypt Reports Volume 9, Undena Publications, Malibu, pp. 50-75
- White, C. E., Chesson, M. S. and Schaub, T. (2014). A Recipe for Disaster: Emerging Urbanism and Unsustainable Plant Economies at Early Bronze Age Ras an-Numayra, Jordan. *Antiquity* 88 (340): 363-377
- Willcox, G. (1990). The plant remains from Hellenistic and Bronze Age levels at Failaka, Kuwait. A preliminary report. *Travaux de la Maison de l'Orient*, 18(1), 43-50.
- Willcox, G. (1995). Some plant impressions from Umm an-Nar island. In: K. Frifelt (ed) *The Island of Umm an-Nar*, Jutland Archaeological Society Publications, Aarhus University Press, Aarhus, pp. 257-259.
- Willcox, G. (2003) L'Économie végétale a Bosra et Si: resultats d'analyse de restes vegetaux carbonises des periodes romaine, byzantine et islamique. In: J. Dentzer-Feydy, J-M Dentzer, P-M Blanc (eds.) *Hauran II*, Vol. I Beyrouth, pp. 177-195
- Willcox, G., & Tengberg, M. (1995). Preliminary report on the archaeobotanical investigations at Tell Abraq with special attention to chaff impressions in mud brick. *Arabian archaeology and epigraphy*, 6(2), 129-138.
- Willerding, U. and Wolf, G. (1990) Paläo-ethnobotanische Untersuchungen von Pflanzenresten aus dem 1. Jahrtausend v.Chr. von Elephantine. *Mitteilungen des Deutschen Archäologischen Instituts, Abteilung Kairo* 46: 263-267
- Williams, B. B. (1991). *Noubadian X-Group Remains from Royal Complexes in Cemeteries Q and 219 and from private cemeteries Q, R, V, W, B, J, and M at Qustul and Ballana*, University of Chicago Oriental Institute Nubian Expedition vol. IX, Chicago
- Zaitschek DV (1980). Plant remains from the cave of the treasure. In: Bar-Adon P (ed) *The cave of the treasure*. Jerusalem, pp 223-227
- Zohary, D., & Spiegel-Roy, P. (1975). Beginnings of fruit growing in the Old World. *Science* 187: 319–327.
